# Supplementary material for: Molecular-Level Architecture of Chlamydomonas reinhardtii’s Glycoprotein-Rich Cell Wall
Source: Research Square preprint supplement (doi:10.21203/rs.3.rs-2371207/v1), 2023-01-12
Supplement: Supplementary file 1 [file 4cda63cd9641ecb3f84e6153.xlsx]

## Sheet: Source Fig 2E (Table S4)
		sum int.	nC	nC overlap	tot nC	int/nCtotal	n spin syst.	(int/nC)*nspin system	% norm.	MS			polysaccharide	monosaccharide or end-group	OVERALL	MS
Man	TOTAL	888943220	63	47	110	8081302	14	113138228	48.2463	44.8		Man	29	21.3	48.2
	poly.	577182540	47	38	85	6.79038e+06	10	6.79038e+07	28.9567							50.4
	mono.	311760680	16	9	25	1.24704e+07	4	4.98817e+07	21.2714			Ara	14	0	14
Ara	TOTAL	155573290	10	9	19	8.18807e+06	4	3.27523e+07	13.9668	16.1						20.1
	poly.	155573290	10	9	19	8.18807e+06	4	3.27523e+07	13.9668			Gal	2.52092	12.8286	20.4
	mono.	0	0	0	0	0	0	0	0							18.7
GlcNAc	TOTAL	45591600	8	0	8	5698950	4	22795800	9.72097	5.6		GlcNAc	9.7	0	9.7
	poly.	45591600	8	0	8	5698950	4	22795800	9.72097							5.6
	mono.	0	0	0	0	0	0	0	0			Rha	2.54818	0	2.5
Gal	TOTAL	159535850	10	0	10	15953585	3	47860755	20.4096	16.6						2.2
	poly.	14272650	5	0	5	2854530	2	5709060	2.43455			Glc	3	0	3
	mono.	145263200	5	0	5	29052640	1	29052640	12.3891							1.5
Rha	TOTAL	20197800	5	2	7	2885400	2	5770800	2.46088	2		Xyl	1	1.44831	2.2
	poly.	20197800	5	2	7	2885400	2	5770800	2.46088							1.5
	mono.	0	0	0	0	0	0	0	0
Glc	TOTAL	48561500	10	4	14	3.46868e+06	2	6.93736e+06	2.95835	1.3
	poly.	48561500	10	4	14	3.46868e+06	2	6.93736e+06	2.95835
	mono.	0	0	0	0	0	0	0	0
Xyl	TOTAL	26230000	14	1	15	1.74867e+06	3	5246000	2.23709	1.3
	poly.	13110200	10	1	11	1.19184e+06	2	2.38367e+06	1.01649
	mono.	13119800	4	0	4	3279950	1	3279950	1.39869
					183		32	2.34501e+08

## Sheet: Source Fig 2F (Table S9)
		sum int.	nC	nC overlap	tot nC	int/nCtotal	n spin syst.	(int/nC)*nspin system	% norm.	MS
Ala	TOTAL	339009750	30	8	38	8.92131e+06	14	1.24898e+08	13.0305	5.3		Amino acid	random	beta	MS
	c random	158903950	12	6	18	8.828e+06	5	4.414e+07	4.64022			Lys	0	6.19431
	b beta	180105800	18	2	20	9005290	9	81047610	8.52014						5.3
Gln	TOTAL	362242400	18	4	22	1.64656e+07	5	8.23278e+07	8.58918	8.1		Asp	4.83327	1.14011
	c random	97919500	10	0	10	9791950	2	19583900	2.05876
	b beta	264322900	8	4	12	2.20269e+07	3	66080725	6.94674			Asn	6.41062	0
Glu	TOTAL	450638300	20	0	20	22531915	4	90127660	9.40293	6.7					14.8
	c random	349546700	12	0	12	2.91289e+07	2	5.82578e+07	6.12435			Glu	6.12435	2.65682
	b beta	101091600	8	0	8	12636450	2	25272900	2.65682
Asp	TOTAL	181310200	13	0	13	1.39469e+07	4	5.57878e+07	5.82028	9		Gln	2.05876	6.94674
	c random	137929000	9	0	9	1.53254e+07	3	4.59763e+07	4.83327						19
	b beta	43381200	4	0	4	10845300	1	10845300	1.14011			Hyp	0	0
Gly	TOTAL	162150700	10	0	10	16215070	5	81075350	8.45851	10					1
	c random	149955900	8	0	8	1.87445e+07	4	74977950	7.88206			Pro	5.83978	0
	b beta	12194800	2	0	2	6097400	1	6097400	0.64099						4.8
Asn	TOTAL	243923400	12	0	12	20326950	3	60980850	6.36207	1		Arg	1.91101	3.20655
	c random	243923400	12	0	12	20326950	3	60980850	6.41062						3.5
	b beta	0	0	0	0	0	0	0	0			Ser	4.03359	2.19715
Val	TOTAL	225390700	19	5	24	9.39128e+06	6	56347675	5.8787	4.8					5
	c random	30153900	6	0	6	5025650	2	10051300	1.05664			Thr	0	4.26042
	b beta	195236800	13	5	18	1.08465e+07	4	4.3386e+07	4.56095						4.6
Leu	TOTAL	315104670	26	2	28	1.12537e+07	7	7.87762e+07	8.21864	3.5		Gly	7.88206	0.64099
	c random	168077370	18	0	18	9.33763e+06	5	4.66882e+07	4.9081						8
	b beta	147027300	8	2	10	14702730	2	29405460	3.09125			Ala	4.64022	8.52014
Lys	TOTAL	206231248	14	0	14	1.47308e+07	4	5.89232e+07	6.1474	5					10.9
	c random	0	0	0	0	0	0	0	0			Tyr	1.50508	0
	b beta	206231248	14	0	14	1.47308e+07	4	5.89232e+07	6.19431						2.4
Ser	TOTAL	237079010	18	2	20	1.1854e+07	5	5.92698e+07	6.18355	4.6		His	0	0
	c random	153477610	12	0	12	1.27898e+07	3	3.83694e+07	4.03359						2
	b beta	83601400	6	2	8	10450175	2	20900350	2.19715			Leu	4.9081	3.09125
Pro	TOTAL	388855500	29	6	35	1.11102e+07	5	5.55508e+07	5.79556	8					5.5
	c random	388855500	29	6	35	1.11102e+07	5	5.55508e+07	5.83978			Met	2.49808	0
	b beta	0	0	0	0	0	0	0	0						1.6
Thr	TOTAL	216144900	14	2	16	1.35091e+07	3	4.05272e+07	4.22816	10.9		Val	1.05664	4.56095
	c random	0	0	0	0	0	0	0	0						5.6
	b beta	216144900	14	2	16	1.35091e+07	3	4.05272e+07	4.26042			Ile	0	2.15113
Arg	TOTAL	76071200	11	0	11	6.91556e+06	7	4.84089e+07	5.05046	2.4					3
	c random	27267600	3	0	3	9089200	2	18178400	1.91101			Phe	0.731894	0
	b beta	48803600	8	0	8	6100450	5	30502250	3.20655						2.8
Ile	TOTAL	102313100	9	11	20	5115655	4	20462620	2.13484	2		Cys	0	0
	c random	0	0	0	0	0	0	0	0						0.2
	b beta	102313100	9	11	20	5115655	4	20462620	2.15113
Phe	TOTAL	45253800	11	2	13	3.48106e+06	2	6.96212e+06	0.726351	5.5
	c random	45253800	11	2	13	3.48106e+06	2	6.96212e+06	0.731894				54.4334	45.5666
	b beta	0	0	0	0	0	0	0	0
Tyr	TOTAL	114536500	17	23	40	2.86341e+06	5	1.43171e+07	1.49368	1.6
	c random	114536500	17	23	40	2.86341e+06	5	1.43171e+07	1.50508
	b beta	0	0	0	0	0	0	0	0
His	TOTAL	0	0	0	0	0	0	0	0	5.6
	c random	0	0	0	0	0	0	0	0
	b beta	0	0	0	0	0	0	0	0
Met	TOTAL	17822200	3	0	3	5.94073e+06	4	2.37629e+07	2.47916	3
	c random	17822200	3	0	3	5.94073e+06	4	2.37629e+07	2.49808
	b beta	0	0	0	0	0	0	0	0
Hyp	TOTAL	0	0	0	0	0	0	0	0	2.8
	c random	0	0	0	0	0	0	0	0
	b beta	0	0	0	0	0	0	0	0
Cys	TOTAL	0	0	0	0	0	0	0	0	0.2
	c random	0	0	0	0	0	0	0	0
	b beta	0	0	0	0	0	0	0	0
					339		87

## Sheet: Source Fig 3E (Table S12)
Portein unit	δ1 (ppm)	AA		Sugar unit	C1	C2	C3	C4	C5	C6		Sugar Type	C1	C2	C3	C4	C5	C6
Hyp	58.8	Hypa		Man1	104.5	73.9	74.9	81.7	77.2	61.8		Man	9/4	4/0	2/2	7/0	0/1	0/0
	34.8	Hypb		Man2	97.7	74.6	76.2	65.7	77.2	61.4		Ara	4/0	4/0	0/0	4/0	0/0
	73.1	Hypc		Man3	100.8	71.5	73.6	67.8	77.1	61.8		Gal	3/2	0/0	0/0	1/0	0/0	0/0
	50.2	Hypd		Man4	103.6	72.2	75.4	67.9	77.2	61.9		Rha	3/0	0/0	1/0	0/0	0/0	0/0
Thr	19.6	Thrc		Man5	100.2	76.8	71.4	68.4	77.7	65.7		Glc	2/0	0/0	0/0	0/0	0/0	0/0
	19.4	Thrc		Man6	102.4	67.8	77.2	65.7	76	62.1		Xyl	2/1	0/0	0/0	1/0	0/0
	17.5	Thrc		Man7	101.7	67.9	77.1	65.6	76	62.1
				Man8	103	71.1	77.1	67.8	75.3	63.1
				Man9	94.6	69.9	78.1	68.3	74.1	64.9
				Man10	96.7	70.4	76.8	65.8	76	62.2
				Man11	97.6	68.6	80	66.2	76.9	61.9
				Man12	96.8	68.6	80.8	66.3	76.9	61.5
				Man13	94.5	70.2	78.6	66.7	77	61.8
				Man14	99.2	73.6	78.5	65.9	70.5	66.2
				Ara1	110.3	82.4	77.6	81.8	61.8
				Ara2	110.1	82.2	77.7	81.7	61.8
				Ara3	109.8	81.9	77.2	81.4	66.1
				Ara4	109.8	81.8	75	81.3	67.2
				Gal1	103.5	72.1	75.4	67.7	72.2	61.8
				Gal2	98.5	72.4	73.7	71.7	75.1	62.9
				Gal3	105.8	73.3	75	81.1	74.8	64.8
				Rha1	100.4	77.1	70.2	71.7	70.3	17.8
				Rha2	100.4	77.1	70.2	71.9	69.8	17.6
				Rha3	100.3	70.2	78.7	73.6	70.9	17.4
				Glc1	100.4	69.6	74.1	72.5	70.9	63.6
				Glc2	100	76.8	71.3	63.8	71.8	61.9
				Xyl1	97.7	76.1	77.2	67.7	60.2
				Xyl2	100.3	70.8	75.9	74.8	64.9
				Xyl3	100.9	77.4	75.1	79.5	67.8

## Sheet: Source Fig 4A (Table S13)
Assignment	13C (ppm)	13C (ppm)	slice # (SI=1024)	control 50 ms DARR	water edited 50 ms DARR	S/S0	Non overlapping peak?	sino S	sino S0	error bar		Spin system	Resolved peaks	S/S0	error bar	1/2 error bar	average/unit
Lys-c-1-a/b	53.9	30.7	847	57487.2	5631.06	0.0489767						Lys	Lys-c-1-b/c	0.23252	0.118875	0.0594377
Lys-c-1-b/c	30.7	22.5	890	44434.2	20663.7	0.23252	x	4.89	6.52	0.118875			Lys-c-1-e/d	0.141526	0.0532408	0.0266204
Lys-c-1-d/c	26.7	22.5	890	77278.8	36750.8	0.237781							Lys-c-2-a/b	0.281558	0.122411	0.0612057
Lys-c-1-e/d	41.9	26.7	868	78360.9	22180.2	0.141526	x	7.06	8.08	0.0532408			Lys-c-2-b/c	0.074757	0.0308818	0.0154409
Lys-c-1-o/a	174	53.9	722	183834	22189.9	0.0603531							Lys-c-2-e/d	0.0494402	0.0198494	0.00992469
Lys-c-2-a/b	54	31.9	840	45637.2	25699.1	0.281558	x	6.09	7.02	0.122411			Lys-c-3-b/c	0.0766039	0.0332939	0.0166469
Lys-c-2-b/c	31.9	23.1	887	49979.9	7472.69	0.074757	x	6.06	8.05	0.0308818			Lys-c-4-b/c	0.100668	0.0460159	0.0230079	0.136725
Lys-c-2-d/c	27.7	23.1	887	193401	94462.9	0.244215
Lys-c-2-e/d	40.6	27.7	863	159288	15750.5	0.0494402	x	7.03	7.06	0.0198494		Asp	Asp-b-1-c/b	0.018631	0.00622272	0.00311136
Lys-c-2-o/a	174.3	54	722	175034	16885.6	0.0482352							Asp-b-2-c/b	0.0128394	0.0076616	0.0038308
Lys-c-3-a/b	54.3	31.2	844	141939	38183.9	0.134508							Asp-c-3-c/b	0.0673597	0.0200471	0.0100236
Lys-c-3-b/c	31.2	22.9	888	104667	16035.8	0.0766039	x	6.1	7.01	0.0332939			Asp-a-4-a/b	0.0183884	0.00609531	0.00304766
Lys-c-3-d/c	27.2	22.9	888	358913	36750.8	0.0511974							Asp-a-4-c/b	0.0402951	0.0111178	0.00555888	0.0315027
Lys-c-3-e/d	40.4	27.2	865	442472	36229.1	0.0409395
Lys-c-3-o/a	174.8	54.3	720	95983.4	24059.4	0.125331						Glu	Glu-c-1-a/b	0.0327784	0.0141462	0.00707308
Lys-c-4-a/b	54.1	33.3	833	20286.5	7698.36	0.189741							Glu-c-1-d/c	0.0351033	0.0104678	0.00523388
Lys-c-4-b/c	33.3	22.3	892	25438.8	5121.73	0.100668	x	5	9.04	0.0460159			Glu-c-1-o/a	0.064901	0.0337454	0.0168727
Lys-c-4-d/c	26.9	22.3	892	77278.8	36750.8	0.237781							Glu-a-2-a/b	0.0637944	0.030017	0.0150085
Lys-c-4-e/d	40.1	26.9	867	217546	36349.1	0.0835436							Glu-a-2-d/c	0.048609	0.0134687	0.00673437
Lys-c-4-o/a	174.3	54.1	721	175034	16885.6	0.0482352							Glu-c-3-d/c	0.0309478	0.0134896	0.0067448
Asp-b-1-a/b	54	40.9	792	272320	18797.2	0.0345131							Glu-c-4-a/b	0.0235899	0.0134113	0.00670567
Asp-b-1-c/b	178.9	40.9	792	30904.2	1151.55	0.018631	x	9.03	8	0.00622272			Glu-c-4-c/b	0.0612766	0.0220145	0.0110073
Asp-b-1-o/a	174	54	722	367668	22189.9	0.0301765							Glu-c-4-d/c	0.0678195	0.0238885	0.0119442	0.0476467
Asp-b-2-a/b	53.1	40.3	795	257414	12136.7	0.0235743
Asp-b-2-c/b	177.8	40.3	795	177638	4561.52	0.0128394	x	4.02	6.07	0.0076616		Gln	Gln-b-1-c/b	0.0125505	0.0173452	0.00867261
Asp-b-2-o/a	174	54	722	367668	22189.9	0.0301765							Gln-b-1-d/c	0.0925719	0.170857	0.0854284
Asp-c-3-a/b	53.6	39.3	800	154188	8841.63	0.0286717							Gln-b-2-d/c	0.0530606	0.0175689	0.00878443
Asp-c-3-c/b	178.2	39.3	800	77410	10428.6	0.0673597	x	8.09	12.07	0.0200471			Gln-c-3-d/c	0.0374603	0.0735084	0.0367542
Asp-c-3-o/a	175.6	53.6	724	77386.6	10318.9	0.066671							Gln-b-4-a/b	0.0688543	0.0197698	0.00988488
Asp-a-4-a/b	54.1	37.6	809	91888.6	3379.37	0.0183884	x	9.1	8.06	0.00609531			Gln-b-4-c/b	0.0155782	0.00590308	0.00295154
Asp-a-4-c/b	178.3	37.6	809	61629.5	4966.73	0.0402951	x	9.07	12.06	0.0111178			Gln-b-4-d/c	0.0341428	0.0129309	0.00646546
Asp-a-4-o/a	175.2	54.1	721	108898	6288.19	0.028872							Gln-b-5-c/b	0.0748275	0.0221963	0.0110981
Asn-b-1-a/b	52.6	39.3	800	436042	38421.9	0.0440575							Gln-b-5-d/c	0.0374603	0.0123305	0.00616523
Asn-b-1-c/b	176	39.3	800	39331.6	32207.2	0.409432	x	5.02	11.09	0.179054			Gln-b-5-o/a	0.0319615	0.014606	0.00730302	0.0458468
Asn-b-1-o/a	174.2	52.6	729	527745	458474	0.434371	x	9.09	9.02	0.135683
Asn-b-2-a/b	52.3	38.6	804	165697	87320.7	0.263495	x	6.08	11.07	0.0988889		Pro	Pro-c-1-b/c	0.0658133	0.0272736	0.0136368
Asn-b-2-c/b	176.4	38.6	804	119480	163663	0.684896	x	6	9.04	0.274008			Pro-c-1-d/c	0.064101	0.0200674	0.0100337
Asn-b-2-o/a	174.3	52.3	731	415622	369041	0.443962	x	7.06	12.03	0.145827			Pro-c-1-o/a	0.108325	0.03609	0.018045
Asn-c-3-a/b	51.1	37.2	812	185574	490967	1.32284							Pro-c-2-a/b	0.00852535	0.025295	0.0126475
Asn-c-3-c/b	175.2	37.2	812	150773	34201.5	0.11342	x	9.03	10.06	0.0337565			Pro-c-2-b/c	0.0150052	0.00827083	0.00413542
Asn-c-3-o/a	174.4	51.1	737	306548	9948.22	0.0162262							Pro-c-2-d/c	0.0300137	0.0569805	0.0284902
Glu-c-1-a/b	55.8	29.4	853	95824.9	6281.98	0.0327784	x	5.1	11.1	0.0141462			Pro-b-3-b/c	0.0780309	0.0314176	0.0157088
Glu-c-1-c/b	33.8	29.4	853	92151.3	10632.2	0.057689							Pro-b-3-d/c	0.0867143	0.0447984	0.0223992
Glu-c-1-d/c	182.9	33.8	830	44733.2	3140.56	0.0351033	x	8.07	12.06	0.0104678			Pro-b-3-o/a	0.222038	0	0
Glu-c-1-o/a	173.9	55.8	712	359142	46617.3	0.064901	x	4.06	12.02	0.0337454			Pro-c-4-a/b	0.0469342	0.0187618	0.00938088
Glu-a-2-a/b	54	25.4	875	170543	21759.4	0.0637944	x	5.01	8.03	0.030017			Pro-c-4-b/c	0.000608613	0.000200463	0.000100231
Glu-a-2-c/b	30.1	25.4	875	479064	9584.6	0.0100035							Pro-c-4-d/c	0.0208392	0.00808237	0.00404119
Glu-a-2-d/c	182.7	30.1	850	3023.64	293.952	0.048609	x	9.01	12.06	0.0134687			Pro-c-5-a/b	0.0171302	0.00919409	0.00459704
Glu-a-2-o/a	179.1	54	722	81684.9	5567.16	0.0340771							Pro-c-5-b/c	0.033128	0.0147153	0.00735767
Glu-c-3-a/b	54.1	29.1	855	221739	15958.9	0.0359858							Pro-c-5-d/c	0.132132	0.0473077	0.0236539
Glu-c-3-c/b	34.9	29.2	855	29410.3	1265.94	0.021522							Pro-c-5-o/a	0.175768	0.0938073	0.0469036	0.0690692
Glu-c-3-d/c	182.6	34.9	824	39162	2423.95	0.0309478	x	5.04	11.09	0.0134896
Glu-c-3-o/a	174.4	54.1	721	458897	16885.6	0.0183981						Arg	Arg-b-1-b/c	0.166693	0.0529202	0.0264601
Glu-c-4-a/b	55.1	28.3	859	304978	14388.8	0.0235899	x	4.05	7.1	0.0134113			Arg-b-2-d/c	0.112093	0.0372879	0.0186439
Glu-c-4-c/b	34.4	28.3	859	371449	45522.2	0.0612766	x	9.01	7.08	0.0220145			Arg-b-3-b/c	0.0907405	0.028391	0.0141955
Glu-c-4-d/c	181.8	34.4	830	704699	95584.6	0.0678195	x	8.01	8.05	0.0238885			Arg-c-5-b/c	0.0662559	0.0282753	0.0141377
Glu-c-4-o/a	175.2	55.1	716	412325	27115.3	0.032881							Arg-c-6-b/c	0.156062	0.0589639	0.029482	0.118369
Gln-b-1-a/b	54.6	28.4	859	211153	18137.2	0.042948
Gln-b-1-c/b	32.5	28.4	859	42080.5	1056.26	0.0125505	x	1.5	5.5	0.0173452		Gly	Gly-b-1-o/a	0.0373834	0.0111256	0.00556282
Gln-b-1-d/c	179	32.5	834	9144.85	1693.11	0.0925719	x	1.09	10.03	0.170857			Gly-c-2-o/a	0.0210408	0.00657239	0.0032862
Gln-b-1-o/a	175.2	54.2	721	136122	6288.19	0.0230976							Gly-c-3-o/a	0.0315818	0.00973235	0.00486618
Gln-b-2-a/b	53.7	30.2	849	193053	22852.9	0.059188							Gly-c-4-o/a	0.0241248	0.00895646	0.00447823
Gln-b-2-c/b	31	30.2	849	834461	57561	0.03449							Gly-a-5-o/a	0.0267375	0.00740242	0.00370121	0.0281737
Gln-b-2-d/c	178.6	31	845	17280.8	1833.86	0.0530606	x	8.09	9.08	0.0175689
Gln-b-2-o/a	174.3	54.2	721	437586	16885.6	0.0192941						Ala	Ala-b-1-a/b	0.064101	0.0212765	0.0106383
Gln-c-3-a/b	53.9	27.6	863	78948.4	15756.4	0.0997894							Ala-b-2-a/b	0.0300137	0.0139578	0.0069789
Gln-c-3-c/b	32	27.6	863	102706	10854	0.0528401							Ala-b-3-a/b	0.0867143	0.0276989	0.0138495
Gln-c-3-d/c	178.4	32	839	265992	19928.3	0.0374603	x	1.03	7.06	0.0735084			Ala-b-4-a/b	0.0208392	0.00908771	0.00454386
Gln-c-3-o/a	174.1	54	722	459584	22189.9	0.0241412							Ala-b-5-a/b	0.132132	0.0586223	0.0293112
Gln-b-4-a/b	55.7	29.9	851	152634	21019	0.0688543	x	9	11	0.0197698			Ala-b-6-a/b	0.0542049	0.0180628	0.00903141
Gln-b-4-c/b	33.3	29.9	851	78658.9	2450.74	0.0155782	x	8.02	7.01	0.00590308			Ala-c-7-a/b	0.0072026	0.00236383	0.00118191
Gln-b-4-d/c	178.1	33.3	833	19489.7	1330.86	0.0341428	x	8	7.03	0.0129309			Ala-c-9-a/b	0.0176181	0.00576506	0.00288253
Gln-b-4-o/a	175.5	55.7	713	200822	25883.2	0.064443							Ala-c-10-a/b	0.00439847	0.00154452	0.00077226
Gln-b-5-a/b	54.4	30.5	848	175713	10355	0.0294657							Ala-c-10-o/a	0.0101689	0.00281049	0.00140525
Gln-b-5-c/b	32	30.5	848	299628	44840.8	0.0748275	x	9.07	10.08	0.0221963			Ala-c-11-a/b	0.00930232	0.00453288	0.00226644
Gln-b-5-d/c	178.4	32	839	265992	19928.3	0.0374603	x	7.04	12.03	0.0123305			Ala-c-11-o/a	0.104895	0.0392675	0.0196337
Gln-b-5-o/a	174.5	54.4	720	300879	19233.1	0.0319615	x	5	9.05	0.014606			Ala-c-12-a/b	0.0688041	0.0247206	0.0123603
Pro-b-1-a/b	60.6	30.5	848	252433	35312.5	0.0699443							Ala-c-13-a/b	0.135768	0.054586	0.027293
Pro-c-1-b/c	30.5	25.7	873	306358	40324.9	0.0658133	x	6.03	8.05	0.0272736			Ala-c-14-a/b	0.169538	0.0529294	0.0264647	0.0610467
Pro-c-1-d/c	49	25.7	876	222238	28491.4	0.064101	x	9.07	9	0.0200674
Pro-c-1-o/a	175.3	60.6	686	38670.9	8378.01	0.108325	x	9.01	8.05	0.03609		Tyr	Tyr-b-1-c/b	0.0492939	0.0151911	0.00759557
Pro-c-2-a/b	61.3	30.1	850	90378	1541.01	0.00852535	x	0.7	2.5	0.025295			Tyr-b-1-d/c	0.0604269	0.0328456	0.0164228
Pro-c-2-b/c	30.1	25.4	875	319376	9584.6	0.0150052	x	4.07	8.01	0.00827083			Tyr-b-1-d/e	0.0357728	0.0116935	0.00584673
Pro-c-2-d/c	48.5	25.4	875	208085	12490.8	0.0300137	x	1.2	2.2	0.0569805			Tyr-b-1-f/e	0.13648	0.0391463	0.0195732
Pro-c-2-o/a	175.4	61.3	683	48591.2	5306.08	0.0545991							Tyr-b-2-f/e	0.19212	0.0820536	0.0410268
Pro-b-3-a/b	59.2	29	856	167946	20151.4	0.0599939							Tyr-b-3-c/b	0.0492939	0.0222129	0.0111064
Pro-b-3-b/c	29	25.3	875	154092	24047.9	0.0780309	x	7	7.05	0.0314176			Tyr-b-3-d/c	0.0604269	0.022683	0.0113415
Pro-b-3-d/c	47.9	25.2	876	142001	24627.1	0.0867143	x	4.09	12	0.0447984			Tyr-b-3-d/e	0.179498	0.0677649	0.0338824
Pro-b-3-o/a	174	59.2	694	117277	52079.9	0.222038							Tyr-b-3-f/e	0.160857	0.0482455	0.0241228
Pro-c-4-a/b	61.7	28.5	858	61834.3	5804.29	0.0469342	x	6.01	9.03	0.0187618			Tyr-b-4-c/b	0.0492939	0.019707	0.00985348
Pro-c-4-b/c	28.5	25	877	152304	185.388	0.000608613	x	7.02	12.1	0.000200463			Tyr-b-4-d/c	0.0604269	0.0273784	0.0136892
Pro-c-4-d/c	47.4	25	877	101042	4211.29	0.0208392	x	6.01	10.04	0.00808237			Tyr-b-4-d/e	0.0357728	0.0157379	0.00786896
Pro-c-4-o/a	175.8	61.7	680	33925.4	11478	0.169165							Tyr-b-4-f/e	0.190308	0.072029	0.0360145
Pro-c-5-a/b	62	29.8	851	121522	4163.39	0.0171302	x	4.09	9.04	0.00919409			Tyr-b-5-c/b	0.0492939	0.0147134	0.00735668
Pro-c-5-b/c	29.8	24.6	879	112968	7484.76	0.033128	x	5.04	10.02	0.0147153			Tyr-b-5-d/c	0.0604269	0.016669	0.00833449
Pro-c-5-d/c	47.1	24.6	879	77629.6	20514.7	0.132132	x	7.1	9.05	0.0473077			Tyr-b-5-d/e	0.179498	0.0808344	0.0404172
Pro-c-5-o/a	175.9	62	679	2170.5	763.009	0.175768	x	4.04	10.03	0.0938073			Tyr-b-5-f/e	0.0172818	0.00895981	0.0044799	0.0921454
Arg-b-1-a/b	54.2	31.5	842	141939	18975.7	0.0668442
Arg-b-1-b/c	31.5	24.9	877	26282.9	8762.34	0.166693	x	8.07	10.08	0.0529202		Leu	Leu-a-1-a/b	0.102237	0.0405434	0.0202717
Arg-b-1-d/c	40.6	24.9	877	141566	19909.8	0.0703196							Leu-a-1-b/c	0.070763	0.0202528	0.0101264
Arg-b-1-o/a	174.4	54.2	721	175034	16885.6	0.0482352							Leu-a-1-c/d	0.148548	0.0465808	0.0232904
Arg-b-2-a/b	53.5	30.4	848	77221.4	228.892	0.00148205							Leu-a-2-c/d	0.073332	0.0389057	0.0194528
Arg-b-2-b/c	30.4	25.8	873	153179	40324.9	0.131627							Leu-a-3-a/b	0.0939675	0.0338031	0.0169015
Arg-b-2-d/c	37.7	25.8	873	31712.9	7109.58	0.112093	x	8.03	9.07	0.0372879			Leu-a-3-c/d	0.0830299	0.0273014	0.0136507
Arg-b-2-o/a	175.6	53.5	724	38693.3	10318.9	0.133342							Leu-c-5-a/b	0.04787	0.0179919	0.00899597
Arg-b-3-a/b	53.9	30.7	847	57487.2	563.064	0.0048973							Leu-c-6-b/c	0.0247201	0.00706862	0.00353431
Arg-b-3-b/c	30.7	24.9	877	40263.4	7307.04	0.0907405	x	9.06	9.02	0.028391			Leu-c-6-o/a	0.0220877	0.00654294	0.00327147
Arg-b-3-d/c	40.6	24.9	877	141566	19909.8	0.0703196							Leu-c-7-b/c	0.1531	0.0439295	0.0219647
Arg-b-3-o/a	173.9	53.9	722	147213	22189.9	0.0753666							Leu-c-7-c/d	0.0709175	0.0273495	0.0136748
Arg-c-4-a/b	53.7	30.1	850	77221.4	228.892	0.00148205							Leu-c-7-o/a	0.0227784	0.00860154	0.00430077	0.0761126
Arg-c-4-b/c	30.1	25.2	876	133955	9584.6	0.0357754
Arg-c-4-d/c	41.6	25.2	876	233774	31363.8	0.0670815						Met	Met-c-1-c/d	0.118104	0.0415748	0.0207874	0.118104
Arg-c-4-o/a	175.6	53.7	723	38693.3	10318.9	0.133342
Arg-c-5-a/b	55.8	29.8	851	61053.6	21019	0.172136						Val	Val-c-1-o/a	0.157284	0.0593119	0.029656
Arg-c-5-b/c	29.8	24.6	879	56483.8	7484.76	0.0662559	x	5.09	12.01	0.0282753			Val-a-2-a/b	0.0114202	0.00509717	0.00254859
Arg-c-5-d/c	41.6	24.6	879	63554.1	28787.1	0.226477							Val-a-2-b/c	0.0998425	0.0326708	0.0163354
Arg-c-5-o/a	173.9	55.8	712	119714	4617.28	0.0192847							Val-a-3-a/b	0.112389	0.0356696	0.0178348
Arg-c-6-a/b	54.2	28.9	856	73912.8	15958.9	0.107957							Val-c-4-a/b	0.00568357	0.00296482	0.00148241
Arg-c-6-b/c	28.9	25.4	875	77046	24047.9	0.156062	x	7.06	8	0.0589639			Val-c-4-b/c	0.0670705	0.0222447	0.0111223
Arg-c-6-d/c	41.6	25.4	875	207618	31363.8	0.0755325							Val-c-5-a/b	0.0218441	0.00725134	0.00362567
Arg-c-6-o/a	174.4	54.2	721	175034	16885.6	0.0482352							Val-c-5-b/c	0.0659312	0.0347459	0.017373
Arg-c-7-a/b	54.6	28.5	858	84461.4	18137.2	0.10737							Val-c-6-a/b	0.0197923	0.00546745	0.00273372
Arg-c-7-b/c	28.5	25	877	76151.8	185.388	0.00121723							Val-c-6-o/a	0.020195	0.00802223	0.00401112	0.0581453
Arg-c-7-d/c	40.4	25	877	141566	19909.8	0.0703196
Arg-c-7-o/a	176.5	54.6	718	17220.7	3773.51	0.109563						Ile	Ile-c-1-a/b	0.0511806	0.0170383	0.00851916
Hyp-u-a/b	58.8	34.8	821	274467	470111	0.856408	x	14.2	16.6	0.158732			Ile-c-1-c1/d	0.029229	0.00834269	0.00417134
Hyp-u-c/b	73.1	34.8	821	58901.2	98589.7	0.836907	x	12.3	17	0.167966			Ile-c-2-b/c2	0.0563523	0.0247615	0.0123807
Hyp-u-c/d	73.1	50.2	741	39071.6	66265.1	0.847995	x	14	16.1	0.160537			Ile-c-3-c1/d	0.0396375	0.0124018	0.00620092
Hyp-u-o/a	171.9	58.8	692	306100	539219	0.880789							Ile-u-4-b/c	0.0608913	0.0260533	0.0130266	0.0474581
Ser-b-1-b/a	64.4	56.5	708	194541	77333.8	0.19876	x	12.6	14.3	0.0420489
Ser-b-1-o/a	172.7	56.6	708	274776	113306	0.206179	x	11.1	14.7	0.0465508		Phe	Phe-u-1-c/d	0.0952203	0.0462164	0.0231082
Ser-b-2-b/a	64.1	57.6	702	151420	34747.4	0.114739	x	12	15.4	0.0242433			Phe-u-1-e/f	0.0501706	0.0174582	0.00872911
Ser-b-2-o/a	175.6	57.6	702	140658	43108.8	0.15324	x	12.3	14.3	0.0328664			Phe-u-2-c/d	0.0952203	0.0283857	0.0141928
Ser-b-3-b/a	63.9	56.4	709	71460	21826.6	0.152719	x	10.6	13.7	0.0364329			Phe-u-2-d/e	0.0803656	0.0419685	0.0209843
Ser-b-3-o/a	172.7	56.4	709	274776	113306	0.206179							Phe-u-2-e/f	0.0176861	0.00937136	0.00468568	0.0677326
Ser-c-4-b/a	63.2	58.1	700	166031	54027.9	0.162704	x	11	13.3	0.0383895
Ser-c-4-o/a	176.9	58.1	700	210006	55811.4	0.13288	x	11.5	15.6	0.0287102		Hyp	Hyp-u-a/b	0.856408	0.158732	0.079366
Ser-c-5-b/a	62.1	56.6	708	395568	166778	0.210808	x	10.7	15.6	0.0477814			Hyp-u-c/b	0.836907	0.167966	0.0839832
Ser-c-5-o/a	176.1	56.6	708	407988	202802	0.248539	x	12.2	13.8	0.0543831			Hyp-u-c/d	0.847995	0.160537	0.0802685	0.847103
Thr-b-1-b/a	68	60.4	687	286084	202758	0.354368
Thr-b-1-b/c	68	19.6	906	418789	264078	0.315288	x	13.3	14.1	0.065176		Asn	Asn-b-1-c/b	0.409432	0.179054	0.089527
Thr-b-1-o/a	174.1	60.4	687	211868	178494	0.421237							Asn-b-1-o/a	0.434371	0.135683	0.0678417
Thr-b-2-b/a	68.9	61.1	684	60171	56742.4	0.471509	x	12.2	16.1	0.0969821			Asn-b-2-a/b	0.263495	0.0988889	0.0494444
Thr-b-2-b/c	68.9	19.4	907	135605	136961	0.504999	x	12.9	14.5	0.104794			Asn-b-2-c/b	0.684896	0.274008	0.137004
Thr-b-2-o/a	173.9	61.1	684	274467	270111	0.492065	x	13.2	18.7	0.0912586			Asn-b-2-o/a	0.443962	0.145827	0.0729134
Thr-b-3-b/a	70.8	59.9	690	58901.2	68589.7	0.582243	x	15.6	14.8	0.108457			Asn-c-3-c/b	0.11342	0.0337565	0.0168783	0.391596
Thr-b-3-b/c	70.8	17.5	917	39071.6	36265.1	0.464084	x	15.9	18.9	0.0762852
Thr-b-3-o/a	173.9	59.9	690	306100	349219	0.570433	x	11.5	14.8	0.125634		Ser	Ser-b-1-b/a	0.19876	0.0420489	0.0210245
Gly-b-1-o/a	169.9	42.6	783	369681	27639.8	0.0373834	x	9.06	10.02	0.0111256			Ser-b-1-o/a	0.206179	0.0465508	0.0232754
Gly-c-2-o/a	171.1	43.4	778	375100	15784.8	0.0210408	x	9.03	9.08	0.00657239			Ser-b-2-b/a	0.114739	0.0242433	0.0121216
Gly-c-3-o/a	172	43.3	779	1.86758e+06	117963	0.0315818	x	8	11.1	0.00973235			Ser-b-2-o/a	0.15324	0.0328664	0.0164332
Gly-c-4-o/a	172.8	43.6	777	604962	29189.1	0.0241248	x	6.02	12.07	0.00895646			Ser-b-3-b/a	0.152719	0.0364329	0.0182165
Gly-a-5-o/a	173.2	42.6	783	440472	23554.2	0.0267375	x	9.03	12.04	0.00740242			Ser-c-4-b/a	0.162704	0.0383895	0.0191947
Ala-b-1-a/b	49	25.7	876	444477	56982.8	0.064101	x	9.03	8.09	0.0212765			Ser-c-4-o/a	0.13288	0.0287102	0.0143551
Ala-b-1-o/a	173.7	49	748	440728	7569.64	0.00858765							Ser-c-5-b/a	0.210808	0.0477814	0.0238907
Ala-b-2-a/b	48.5	25.4	875	416170	24981.6	0.0300137	x	5.08	8.08	0.0139578			Ser-c-5-o/a	0.248539	0.0543831	0.0271916	0.175619
Ala-b-2-o/a	173.6	48.5	751	206061	59901.6	0.145349
Ala-b-3-a/b	47.9	25.2	876	284003	49254.2	0.0867143	x	8.03	10	0.0276989		Thr	Thr-b-1-b/c	0.315288	0.065176	0.032588
Ala-b-4-a/b	47.4	25	877	202085	8422.58	0.0208392	x	6.02	7.08	0.00908771			Thr-b-2-b/a	0.471509	0.0969821	0.048491
Ala-b-5-a/b	47.1	24.6	879	155259	41029.5	0.132132	x	5.04	10.08	0.0586223			Thr-b-2-b/c	0.504999	0.104794	0.0523972
Ala-b-6-a/b	48.3	22.8	889	115963	12571.6	0.0542049	x	9.02	8.04	0.0180628			Thr-b-2-o/a	0.492065	0.0912586	0.0456293
Ala-b-6-o/a	173.6	48.3	752	206061	59901.6	0.145349							Thr-b-3-b/a	0.582243	0.108457	0.0542284
Ala-c-7-a/b	51.8	18.4	913	249083	3588.09	0.0072026	x	7.07	12.02	0.00236383			Thr-b-3-b/c	0.464084	0.0762852	0.0381426
Ala-c-7-o/a	176.6	51.8	734	29663.5	31609.8	0.532805							Thr-b-3-o/a	0.570433	0.125634	0.0628171	0.485803
Ala-c-8-a/b	50.6	19.2	908	147992	17612.4	0.0595043
Ala-c-8-o/a	177	50.6	740	73965.2	24114.2	0.163011
Ala-c-9-a/b	50	18.9	910	311752	10985	0.0176181	x	7.09	12.06	0.00576506
Ala-c-9-o/a	175.1	50	743	252938	13327.7	0.0263459						Ac-Met	Ac-1	0.211023	0.0460288	0.0230144
Ala-c-10-a/b	51.5	17.2	919	244211	2148.31	0.00439847	x	8.02	8.09	0.00154452			Ac-2	0.131759	0.0279166	0.0139583
Ala-c-10-o/a	176.7	51.5	735	95144.1	1935.02	0.0101689	x	9.05	12.05	0.00281049			Ac-3	0.155499	0.0361543	0.0180772
Ala-c-11-a/b	51	17.2	919	313015	5823.53	0.00930232	x	5.03	7.1	0.00453288			Ac-4	0.224153	0.0488928	0.0244464	0.180608
Ala-c-11-o/a	176.1	51	738	93466	19608.2	0.104895	x	6.1	11.07	0.0392675
Ala-c-12-a/b	51.4	17.5	917	184681	25413.6	0.0688041	x	7.06	9.05	0.0247206		Ara	Ara-1-2/3	0.373407	0.0872726	0.0436363
Ala-c-12-o/a	177.2	51.4	736	21294.4	21473	0.504193							Ara-2-4/5	0.455778	0.0943994	0.0471997
Ala-c-13-a/b	50.1	17.3	918	278139	75524.7	0.135768	x	7.05	7.02	0.054586			Ara-3-1/2	0.664677	0.143092	0.0715459
Ala-c-13-o/a	175.2	50.1	743	252938	13327.7	0.0263459							Ara-4-4/5	0.18979	0.041208	0.020604	0.420913
Ala-c-14-a/b	48.4	16.6	922	133051	45114.4	0.169538	x	9.1	9.02	0.0529294
Ala-c-14-o/a	173.6	48.4	752	206061	59901.6	0.145349						Gal	Gal-2-1/2	0.900356	0.211752	0.105876
Tyr-b-1-a/b	51.1	37.4	811	53021.1	15342.7	0.144685							Gal-2-3/2	0.813703	0.180728	0.0903642
Tyr-b-1-c/b	130.2	37.4	811	15076.4	1486.35	0.0492939	x	8.03	11.02	0.0151911			Gal-3-1/2	0.74013	0.154877	0.0774385
Tyr-b-1-d/c	131.6	130.2	314	7934.97	958.972	0.0604269	x	4.03	9.02	0.0328456			Gal-3-4/5	0.811673	0.175387	0.0876933
Tyr-b-1-d/e	131.6	116.7	386	20007	1431.41	0.0357728	x	7.1	12.06	0.0116935			Gal-3-5/6	0.842557	0.18754	0.0937701	0.821684
Tyr-b-1-f/e	156.4	116.7	386	9350.28	2552.25	0.13648	x	9.01	11.01	0.0391463
Tyr-b-1-o/a	174.6	51.1	737	87585.1	18507.2	0.105653						Glc	Glc-1-1/2	0.462985	0.105015	0.0525077
Tyr-b-2-a/b	51.1	37.4	811	53021.1	15342.7	0.144685							Glc-1-3/4	0.357083	0.0781494	0.0390747
Tyr-b-2-c/b	130.2	37.4	811	15076.4	1486.35	0.0492939							Glc-1-4/5	0.514825	0.113018	0.056509
Tyr-b-2-d/c	131.2	130.2	314	14624.7	2909.49	0.0994722							Glce-2-1/2	0.407004	0.084141	0.0420705
Tyr-b-2-d/e	131.2	116.9	385	8951.91	686.76	0.0383583							Glce-2-3/4	0.3729	0.0795848	0.0397924	0.422959
Tyr-b-2-f/e	155.5	116.9	385	9788	3760.93	0.19212	x	5.08	12.08	0.0820536
Tyr-b-2-o/a	174.6	51.1	737	87585.1	18507.2	0.105653						Man	Man-1-1/2	0.253202	0.0567276	0.0283638
Tyr-b-3-a/b	51.1	37.4	811	53021.1	15342.7	0.144685							Man-1-4/5	0.722037	0.156662	0.0783308
Tyr-b-3-c/b	130.2	37.4	811	15076.4	1486.35	0.0492939	x	5.1	9.01	0.0222129			Man-1-5/6	0.544204	0.112422	0.056211
Tyr-b-3-d/c	131.6	130.2	314	7934.97	958.972	0.0604269	x	6.09	11	0.022683			Man-2-1/2	0.533186	0.130537	0.0652686
Tyr-b-3-d/e	131.6	116	390	6842.53	2456.45	0.179498	x	7.07	8	0.0677649			Man-3-1/2	0.730173	0.166906	0.0834528
Tyr-b-3-f/e	156	116	390	3730.84	1200.27	0.160857	x	8	12.07	0.0482455			Man-3-5/6	0.913762	0.198086	0.099043
Tyr-b-3-o/a	174.6	51.1	737	87585.1	18507.2	0.105653							Man-4-1/2	0.782274	0.175262	0.0876309
Tyr-b-4-a/b	51.1	37.4	811	53021.1	15342.7	0.144685							Man-4-3/2	0.87431	0.187119	0.0935594
Tyr-b-4-c/b	130.2	37.4	811	15076.4	1486.35	0.0492939	x	7.05	7.1	0.019707			Man-4-5/4	0.785146	0.158246	0.0791229
Tyr-b-4-d/c	131.6	130.2	314	7934.97	958.972	0.0604269	x	5.06	9.03	0.0273784			Man-5-1/2	0.33917	0.0773618	0.0386809
Tyr-b-4-d/e	131.6	116.5	387	20007	1431.41	0.0357728	x	5.1	10.03	0.0157379			Man-5-2/3	0.320635	0.0711697	0.0355848
Tyr-b-4-f/e	155.1	116.5	387	17611.3	6703.13	0.190308	x	6.02	11.03	0.072029			Man-6-3/2	0.785146	0.172918	0.0864588
Tyr-b-4-o/a	174.6	51.1	737	87585.1	18507.2	0.105653							Man-6-3/4	0.691768	0.154696	0.0773482
Tyr-b-5-a/b	51.1	37.4	811	53021.1	15342.7	0.144685							Man-6-5/6	0.179606	0.0398748	0.0199374
Tyr-b-5-c/b	130.2	37.4	811	15076.4	1486.35	0.0492939	x	8.05	12.09	0.0147134			Man-7-1/2	0.668447	0.142052	0.0710262
Tyr-b-5-d/c	131.6	130.2	314	7934.97	958.972	0.0604269	x	9.09	12.02	0.016669			Man-7-3/2	0.7443	0.149671	0.0748356
Tyr-b-5-d/e	131.6	115.9	390	6842.53	2456.45	0.179498	x	5.09	9.09	0.0808344			Man-8-3/4	0.785146	0.189271	0.0946354
Tyr-b-5-f/e	155.5	115.9	390	34909.3	1206.59	0.0172818	x	4.07	12.1	0.00895981			Man-8-5/6	0.492558	0.113553	0.0567765
Tyr-b-5-o/a	174.6	51.1	737	87585.1	18507.2	0.105653							Man-9-1/2	0.406986	0.0928706	0.0464353
Leu-a-1-a/b	54.9	41.8	787	62147.2	12707.5	0.102237	x	6.08	9.03	0.0405434			Man-9-3/2	0.237673	0.0486009	0.0243004
Leu-a-1-b/c	41.8	26.6	869	78360.9	11090.1	0.070763	x	9.01	11.07	0.0202528			Man-9-3/4	0.268973	0.0622452	0.0311226
Leu-a-1-c/d	26.6	21.5	896	16911.9	5024.47	0.148548	x	9.01	9.03	0.0465808			Man-9-5/4	0.258982	0.0585359	0.029268
Leu-a-1-o/a	175.8	54.9	717	65015.5	7576.72	0.0582686							Man-10-1/2	0.349155	0.0823334	0.0411667
Leu-a-2-a/b	55	41.5	789	76002	10042.4	0.0660669							Man-10-3/2	0.745515	0.179998	0.0899991
Leu-a-2-b/c	41.5	25.4	875	207618	15681.9	0.0377663							Man-11-3/2	0.390988	0.080995	0.0404975
Leu-a-2-c/d	25.4	21.9	894	16984.4	2490.99	0.073332	x	4.07	10	0.0389057			Man-11-3/4	0.697618	0.162219	0.0811097
Leu-a-2-o/a	175.2	55	716	137442	13557.6	0.0493215							Man-11-5/6	0.660773	0.139616	0.0698078
Leu-a-3-a/b	54.2	40.8	792	50009.8	9398.6	0.0939675	x	9	7.07	0.0338031			Man-12-3/2	0.413929	0.0975778	0.0487889
Leu-a-3-b/c	40.8	25.1	877	154068	16596.3	0.0538604							Man-12-5/4	0.65786	0.15771	0.0788552
Leu-a-3-c/d	25.1	23.2	887	165046	27407.4	0.0830299	x	7.04	12.08	0.0273014			Man-13-3/2	0.627398	0.0681801	0.0340901
Leu-a-3-o/a	174	54.2	721	144381	16073.5	0.0556635							Man-14-3/2	0.364025	0.0849144	0.0424572	0.555643
Leu-c-4-a/b	53.8	39.9	797	125647	3057.53	0.0121672
Leu-c-4-b/c	39.9	27	866	217546	18174.5	0.0417718						Rha	Rha-1-5/6	0.264787	0.0526192	0.0263096
Leu-c-4-c/d	27	22.2	892	77278.8	996	0.0064442							Rha-2-1/2	0.594155	0.13673	0.0683648
Leu-c-4-o/a	176.2	53.8	723	51211.9	5004.04	0.0488562							Rha-2-5/6	0.374266	0.0851198	0.0425599
Leu-c-5-a/b	53.3	40.5	794	63383.8	6068.36	0.04787	x	6.07	11.06	0.0179919			Rha-3-1/2	0.535148	0.127343	0.0636714
Leu-c-5-b/c	40.5	27.2	865	245147	18114.6	0.0369463							Rha-3-5/6	0.381469	0.0855686	0.0427843	0.429965
Leu-c-5-c/d	27.2	22.9	888	358913	18375.4	0.0255987
Leu-c-5-o/a	176.6	53.3	726	36682.7	3666.15	0.0499712						Xyl	Xyl-1-1/2	0.524236	0.112635	0.0563176
Leu-c-6-a/b	53.3	40.6	794	63383.8	693.872	0.00547358							Xyl-1-3/2	0.59816	0.141865	0.0709326
Leu-c-6-b/c	40.6	27.8	862	159288	7875.23	0.0247201	x	9.04	11.04	0.00706862			Xyl-2-1/2	0.557263	0.118331	0.0591654
Leu-c-6-c/d	27.8	23.3	886	193401	47231.5	0.122107							Xyl-2-3/4	0.372619	0.0849118	0.0424559
Leu-c-6-o/a	175.9	53.3	726	83526.5	3689.82	0.0220877	x	9.1	10.07	0.00654294			Xyl-3-2/3	0.58946	0.132295	0.0661477
Leu-c-7-a/b	52.4	39.7	799	65462.4	13472.3	0.102901							Xyl-3-4/3	0.44558	0.09975	0.049875
Leu-c-7-b/c	39.7	28.8	857	17403.2	5328.86	0.1531	x	9.01	11	0.0439295			Xyl-3-4/5	0.680419	0.163847	0.0819236	0.538248
Leu-c-7-c/d	28.8	23	888	19062.8	2703.77	0.0709175	x	6.05	10.07	0.0273495
Leu-c-7-o/a	176.6	52.4	730	111135	5062.96	0.0227784	x	7.06	8.01	0.00860154
Met-c-1-a/b	54.7	30.6	847	71627.9	12546.7	0.0875823
Met-c-1-c/b	32	30.6	847	71910.8	44840.8	0.311781
Met-c-1-c/d	32	19	909	31168.6	7362.28	0.118104	x	8.06	8.01	0.0415748
Met-c-1-o/a	175.6	54.7	718	39009.3	3153.43	0.040419
Met-c-2-a/b	53.6	30.2	849	46332.8	11016.9	0.118889
Met-c-2-c/b	31	30.2	849	200271	57561	0.143708
Met-c-2-c/d	31	18.5	912	20816.9	9281.91	0.222941
Met-c-2-o/a	176.4	53.6	724	30727.1	1000.08	0.0162735
Met-c-3-a/b	53.8	30.7	847	34492.3	563.064	0.00816217
Met-c-3-b/c	30.7	29.7	852	131993	32676.5	0.123781
Met-c-3-c/d	29.7	19	909	71754.8	11139.4	0.0776214
Met-c-3-o/a	176.2	53.8	723	30727.1	10000.1	0.162724
Met-c-4-a/b	54.4	30.9	845	58271.2	6659.74	0.0571443
Met-c-4-b/c	30.9	29.8	851	131993	32676.5	0.123781
Met-c-4-c/d	29.8	17.6	917	28521.6	9747.34	0.170876
Met-c-4-o/a	174.7	54.4	720	57590	24059.4	0.208885
Val-c-1-a/b	61.6	31.4	843	114240	5599.64	0.0245083
Val-c-1-b/c	31.4	19.7	905	474616	21993.8	0.0231702
Val-c-1-o/a	175.8	62.1	678	24255.8	7630.09	0.157284	x	7.05	8.05	0.0593119
Val-a-2-a/b	62.1	29.8	851	182283	4163.39	0.0114202	x	5	10.1	0.00509717
Val-a-2-b/c	29.8	17.7	916	14259.2	2847.34	0.0998425	x	7.09	12.06	0.0326708
Val-a-2-o/a	175.6	62.3	677	90835.2	4911.45	0.0270349
Val-a-3-a/b	62.3	29.7	852	86223.7	19381.2	0.112389	x	8.1	10.03	0.0356696
Val-a-3-b/c	29.7	19	909	358774	11139.4	0.0155243
Val-a-3-o/a	174.8	61.5	682	114254	11463.6	0.0501674
Val-c-4-a/b	61.2	30.3	849	135567	1541.01	0.00568357	x	4.09	11.01	0.00296482
Val-c-4-b/c	30.3	19.5	907	281825	37804.3	0.0670705	x	8.08	9.06	0.0222447
Val-c-4-o/a	174.8	61.2	683	75316.3	8389.39	0.0556944
Val-c-5-a/b	60.7	30.1	850	122287	5342.51	0.0218441	x	9.07	8.06	0.00725134
Val-c-5-b/c	30.1	18.4	913	109244	14405.2	0.0659312	x	4	12.01	0.0347459
Val-c-5-o/a	172.1	60.7	686	262424	9267.74	0.017658
Val-c-6-a/b	60.1	30.9	845	160428	6350.51	0.0197923	x	9.07	12.02	0.00546745
Val-c-6-b/c	30.9	18.5	912	104085	9281.91	0.0445882
Val-c-6-o/a	172.4	60.1	689	372043	15026.8	0.020195	x	6.05	9.08	0.00802223
Ile-c-1-a/b	59.3	36.7	814	105855	10835.4	0.0511806	x	9.04	8.04	0.0170383
Ile-c-1-b/c1	36.7	25.2	876	107481	25629.4	0.119227
Ile-c-1-b/c2	36.7	15.8	926	220876	24893.8	0.0563523
Ile-c-1-c1/d	25.2	11.1	948	7195.12	420.612	0.029229	x	9.09	11	0.00834269
Ile-c-1-o/a	173.9	59.3	693	193139	12565.5	0.0325298
Ile-c-2-a/b	59.3	36.7	814	105855	10835.4	0.0511806
Ile-c-2-b/c1	36.7	25.4	875	107481	15629.4	0.0727073
Ile-c-2-b/c2	36.7	15.8	926	220876	24893.8	0.0563523	x	5.1	10.09	0.0247615
Ile-c-2-c1/d	25.4	11.8	947	228461	18111.3	0.0396375
Ile-c-2-o/a	174.2	59.3	693	117277	5239.86	0.0223397
Ile-c-3-a/b	59.2	36.9	813	105855	10835.4	0.0511806
Ile-c-3-b/c1	36.9	25.5	874	157097	11841.2	0.0376877
Ile-c-3-b/c2	36.9	15.7	927	220876	24893.8	0.0563523
Ile-c-3-c1/d	25.5	12	947	228461	18111.3	0.0396375	x	9.02	9.06	0.0124018
Ile-c-3-o/a	173.7	59.2	694	193139	12565.5	0.0325298
Ile-u-4-b/c	37.7	16.3	924	45546.8	5546.81	0.0608913	x	5.07	12.07	0.0260533
Phe-u-1-c/d	138.6	130.2	314	52149	9931.29	0.0952203	x	5.06	7.1	0.0462164
Phe-u-1-d/e	130.2	129.3	318	192598	30956.5	0.0803656
Phe-u-1-e/f	129.3	127.6	327	149870	15038.1	0.0501706	x	7.02	10.01	0.0174582
Phe-u-2-c/d	138.6	130.1	314	52149	9931.29	0.0952203	x	9.04	10.01	0.0283857
Phe-u-2-d/e	130.1	129.4	318	192598	30956.5	0.0803656	x	4.04	12.03	0.0419685
Phe-u-2-e/f	129.4	128.1	325	121667	4303.62	0.0176861	x	4.07	10.09	0.00937136
Ac-1	175.5	23.3	586	250632	105778	0.211023	x	12.2	13.9	0.0460288
Ac-2	175.2	21.5	595	629412	165861	0.131759	x	12.2	14.9	0.0279166
Ac-3	173.4	22.8	589	100082	31125.4	0.155499	x	10.5	15	0.0361543
Ac-4	175.6	20.5	601	166367	74583.3	0.224153	x	12.2	13.9	0.0488928
Ara-1-1/2	110.3	82.4	570	26615.2	25570.8	0.480381
Ara-1-2/3	82.4	77.6	595	260560	194590	0.373407	x	10.6	14.5	0.0872726
Ara-1-4/3	81.8	77.6	595	339963	289495	0.425775
Ara-1-4/5	81.8	61.8	680	179963	95715.7	0.265932
Ara-2-1/2	110.1	82.2	571	26615.2	25570.8	0.480381
Ara-2-2/3	82.2	77.7	595	260560	194590	0.373407
Ara-2-4/3	81.7	77.7	595	339963	289495	0.425775
Ara-2-4/5	81.7	61.8	680	105003	95715.7	0.455778	x	12.2	15.8	0.0943994
Ara-3-1/2	109.8	81.9	572	46448.6	61746.7	0.664677	x	12.1	14.5	0.143092
Ara-3-2/3	81.9	77.2	597	529418	603911	0.570355
Ara-3-4/3	81.4	77.2	597	696999	417053	0.299178
Ara-3-4/5	81.4	66.2	656	62260.5	46663.8	0.374747
Ara-4-1/2	109.8	81.8	573	46400.6	61746.7	0.665365
Ara-4-2/3	81.8	75	609	413137	315812	0.382212
Ara-4-4/3	81.7	74.9	610	413137	315812	0.382212
Ara-4-4/5	81.3	67.2	651	41313	15681.6	0.18979	x	12.6	13.5	0.041208
Gal-1-1/2	103.5	72.1	625	32227.2	49027.2	0.760649
Gal-1-3/2	75.4	72.1	625	509371	920221	0.903292
Gal-1-3/4	75.4	67.7	648	41859.2	62256.3	0.74364
Gal-1-5/4	72.2	67.7	648	55844	83341.3	0.746198
Gal-1-5/6	72.1	61.8	680	107188	155152	0.723736
Gal-2-1/2	98.5	72.4	623	31255.8	56282.6	0.900356	x	10.2	15.4	0.211752
Gal-2-3/2	73.7	72.4	623	199956	325409	0.813703	x	11.1	15.4	0.180728
Gal-2-3/4	73.7	71.7	627	802823	1.28853e+06	0.8025
Gal-2-5/4	75.1	71.7	627	165152	286625	0.867762
Gal-2-5/6	75.1	62.9	674	29546.8	58464.2	0.989349
Gal-3-1/2	105.8	73.3	618	45441.4	67265	0.74013	x	13	14.1	0.154877
Gal-3-3/2	75	73.3	618	274791	511569	0.930835
Gal-3-4/3	81.1	75	609	418894	663872	0.792411
Gal-3-4/5	81.1	74.8	610	418894	680010	0.811673	x	12.8	13.4	0.175387
Gal-3-5/6	74.8	64.8	664	75436.2	127118	0.842557	x	11.4	14.6	0.18754
Glc-1-1/2	100.4	69.6	638	51035	47256.8	0.462985	x	11.2	14.3	0.105015
Glc-1-3/2	74.1	69.6	638	83136.4	95730.1	0.575741
Glc-1-3/4	74.1	72.5	623	5557.22	3968.78	0.357083	x	12	14.1	0.0781494
Glc-1-4/5	72.5	70.9	631	92683.4	95431.4	0.514825	x	11.3	15.4	0.113018
Glc-1-5/6	70.9	63.6	670	121187	101187	0.417483
Glce-2-1/2	100	76.8	600	79503.2	64716.2	0.407004	x	12.6	15.1	0.084141
Glce-2-2/3	76.8	71.3	629	64037.9	49278.7	0.384762
Glce-2-3/4	71.3	63.8	669	37971.8	28319.3	0.3729	x	11.6	15.9	0.0795848
Glce-2-5/4	71.8	63.8	669	80037.6	70119.9	0.438044
Glce-2-5/6	71.8	61.9	679	46092.8	36245.4	0.393179
Man-1-1/2	104.5	73.9	615	303165	153524	0.253202	x	11.9	13.5	0.0567276
Man-1-3/2	74.9	73.9	615	918377	1269929	0.691399
Man-1-4/3	81.7	74.9	610	247882	315812	0.637021
Man-1-4/5	81.7	77.2	597	418200	603911	0.722037	x	12.7	13.4	0.156662
Man-1-5/6	77	61.8	680	553516	602451	0.544204	x	12.8	14.8	0.112422
Man-2-1/2	97.7	74.6	611	646927	689865	0.533186	x	10.4	13.2	0.130537
Man-2-3/2	76.2	74.6	611	569748	517635	0.454267
Man-2-3/4	76.2	65.7	659	122903	218614	0.889376
Man-2-5/4	77.2	65.7	659	276123	382026	0.691768
Man-2-5/6	76.9	61.5	682	553516	736099	0.664931
Man-3-1/2	100.8	71.7	627	164124	239677	0.730173	x	10.7	15.2	0.166906
Man-3-3/2	73.6	71.7	627	481694	688531	0.714698
Man-3-3/4	73.6	67.8	648	122789	76133.7	0.310018
Man-3-5/4	77.1	67.8	648	34944.4	54872.9	0.785146
Man-3-5/6	77.7	59.6	692	13202.9	24128.6	0.913762	x	12.9	13.2	0.198086
Man-4-1/2	103.5	72.3	624	31336.3	49027.2	0.782274	x	11.9	13.5	0.175262
Man-4-3/2	75.4	72.3	624	120221	210221	0.87431	x	12.7	13.8	0.187119
Man-4-3/4	75.4	67.7	648	25115.5	32256.3	0.642159
Man-4-5/4	77.2	67.7	648	34944.4	54872.9	0.785146	x	12.7	15.9	0.158246
Man-4-5/6	77	61.8	680	553516	602451	0.544204
Man-5-1/2	100.2	76.8	600	95403.8	64716.2	0.33917	x	11.1	14.3	0.0773618
Man-5-2/3	76.8	71.3	629	76845.5	49278.7	0.320635	x	12.1	13.5	0.0711697
Man-5-3/4	71.4	68.4	645	94755.7	165964	0.875749
Man-5-5/4	77.7	68.4	645	39073.8	66897.8	0.856043
Man-5-5/6	77.7	65.7	659	74700.7	104453	0.699142
Man-6-1/2	102.4	67.8	648	52938.2	73075.3	0.690194
Man-6-3/2	77.2	67.8	648	34944.4	54872.9	0.785146	x	12.6	13.1	0.172918
Man-6-3/4	77.2	65.7	659	276123	382026	0.691768	x	11.1	15.1	0.154696
Man-6-5/4	76	65.7	659	122903	218614	0.889376
Man-6-5/6	76	62.1	678	76466.3	27467.6	0.179606	x	11.4	14.7	0.0398748
Man-7-1/2	101.7	67.9	647	26736.7	35744.1	0.668447	x	12.5	14.3	0.142052
Man-7-3/2	77.1	67.9	647	30144.4	44872.9	0.7443	x	12.8	15.8	0.149671
Man-7-3/4	77.1	65.6	660	276123	382026	0.691768
Man-7-5/4	76	65.6	660	122903	159614	0.649349
Man-7-5/6	76	62.1	678	76466.3	27467.6	0.179606
Man-8-1/2	103	71.1	630	27652.9	49525.1	0.895477
Man-8-3/2	77.1	71.1	630	28606.3	51779.2	0.905032
Man-8-3/4	77.1	67.8	648	34944.4	54872.9	0.785146	x	10.3	14	0.189271
Man-8-5/4	75.3	67.8	648	25115.5	32256.3	0.642159
Man-8-5/6	75.3	63.1	673	17728.1	17464.2	0.492558	x	10.5	15.4	0.113553
Man-9-1/2	94.6	69.9	637	444232	361592	0.406986	x	10.8	15	0.0928706
Man-9-3/2	78.1	69.9	637	146482	69629.6	0.237673	x	12.9	15	0.0486009
Man-9-3/4	78.1	68.3	645	26990.3	14519.3	0.268973	x	11.5	13.1	0.0622452
Man-9-5/4	74.1	68.3	645	41762.9	21631.7	0.258982	x	12	13.1	0.0585359
Man-9-5/6	74.1	64.9	663	31692.9	10914.2	0.172188
Man-10-1/2	96.7	70.4	934	137920	96311	0.349155	x	10.8	13.7	0.0823334
Man-10-3/2	76.8	70.4	634	64829.7	96663.1	0.745515	x	10.4	13.7	0.179998
Man-10-3/4	76.8	65.8	658	366332	566229	0.772835
Man-10-5/4	76	65.8	658	122903	218614	0.889376
Man-10-5/6	76	62.2	678	76466.3	27467.6	0.179606
Man-11-1/2	97.6	68.6	644	1.1273e+06	1.05763e+06	0.469101
Man-11-3/2	80.1	68.3	645	172272	134713	0.390988	x	12.5	15.2	0.080995
Man-11-3/4	80	66.2	656	96700.1	134919	0.697618	x	10.2	16	0.162219
Man-11-5/4	76.9	66.2	656	633012	832866	0.65786
Man-11-5/6	76.9	61.9	679	455868	602451	0.660773	x	12	15.4	0.139616
Man-12-1/2	96.8	68.6	644	334008	419015	0.627253
Man-12-3/2	80.8	68.6	644	362457	300063	0.413929	x	10.5	14.4	0.0975778
Man-12-3/4	80.8	66.3	656	32184.9	42721	0.663681
Man-12-5/4	76.9	66.3	656	633012	832866	0.65786	x	10.2	14.5	0.15771
Man-12-5/6	76.9	61.5	682	553516	736099	0.664931
Man-13-1/2	94.5	70.2	635	596728	508629	0.426181
Man-13-3/2	78.6	70.2	653	60739.2	38107.7	0.313699	x	11.7	14.9	0.0681801
Man-13-3/4	78.6	66.7	654	60495.9	82757	0.683989
Man-13-5/4	77	66.7	654	254136	295076	0.580546
Man-13-5/6	77	61.8	680	553516	602451	0.544204
Man-14-1/2	99.2	73.6	617	22937.3	40227.2	0.876894
Man-14-3/2	78.5	73.6	617	74403.1	54169.1	0.364025	x	11.1	13.5	0.0849144
Man-14-3/4	78.5	66.1	657	41949	65404.5	0.779572
Man-14-5/4	70.5	65.9	658	59127.6	33073.2	0.279677
Man-14-5/6	70.5	66.2	656	82425.5	56280	0.341399
Rha-1-1/2	100.4	77.1	598	7011.8	8332.18	0.594155
Rha-1-2/3	77.1	70.2	635	37129.1	40455.8	0.544799
Rha-1-4/3	71.7	70.2	635	76636.5	38304.3	0.249909
Rha-1-4/5	71.7	70.3	634	76636.5	38304.3	0.249909
Rha-1-5/6	70.3	17.8	916	5042.62	2670.44	0.264787	x	13	15.9	0.0526192
Rha-2-1/2	100.4	77.1	598	7011.8	8332.18	0.594155	x	10.9	14.4	0.13673
Rha-2-2/3	77.1	70.2	635	37129.1	46045.8	0.620077
Rha-2-4/3	71.9	70.2	635	76636.5	38302.3	0.249896
Rha-2-4/5	71.9	69.8	637	92432.5	97235.7	0.525982
Rha-2-5/6	69.8	17.6	917	20013.6	14980.8	0.374266	x	11.2	14.2	0.0851198
Rha-3-1/2	100.4	69.6	638	10517.5	11256.8	0.535148	x	10.9	13.2	0.127343
Rha-3-3/2	78.7	70.2	635	25308	18107.7	0.357746
Rha-3-3/4	78.7	73.6	617	31001.3	26169.1	0.422065
Rha-3-4/5	73.6	70.9	631	213744	142290	0.332852
Rha-3-5/6	70.9	17.4	918	48835.5	37258.4	0.381469	x	10.8	15.8	0.0855686
Xyl-1-1/2	97.7	76.1	603	216641	227142	0.524236	x	11.6	15.6	0.112635
Xyl-1-3/2	77.2	76.1	603	36729.8	43940.6	0.59816	x	10.7	13.7	0.141865
Xyl-1-3/4	77.2	67.7	648	95605.2	107436	0.561876
Xyl-1-4/5	67.7	61.2	683	10123.9	8347.53	0.412267
Xyl-2-1/2	100.3	70.8	632	32350.5	36055.4	0.557263	x	11.1	17.8	0.118331
Xyl-2-3/2	75.9	70.8	632	26880.3	16137.8	0.300179
Xyl-2-3/4	75.9	74.8	610	128827	96006.9	0.372619	x	10.9	14.8	0.0849118
Xyl-2-4/5	74.8	64.9	663	33859	48559.2	0.717079
Xyl-3-1/2	100.9	77.4	596	36061.2	36680.5	0.508586
Xyl-3-2/3	77.4	75.1	609	42677	50312.8	0.58946	x	11	15.2	0.132295
Xyl-3-4/3	79.5	75.1	609	16166.2	14406.7	0.44558	x	10.8	15.9	0.09975
Xyl-3-4/5	79.5	67.8	648	8542.47	11624.9	0.680419	x	10.4	13.8	0.163847

## Sheet: Source Fig 4B13C T1
overlap	error/2	Co	error/2	Tyr	error/2	Pro	error/2	Phe	error/2	Leu	error/2	Ile	error/2	Gly	error/2	Gln	error/2	Glu	error/2	Asn	error/2	Ala	error/2	Ser	error/2		Man	error/2	Ara	error/2	Gal	error/2	Glc	error/2	Xyl	error/2	overlap	error/2
0.345	0.05585	0.76	0.10095	0.551	0.07525	0.547	0.0731	0.266	0.10615	0.379	0.05475	0.614	0.0818	0.649	0.1828	0.816	0.1217	0.585	0.0866	0.529	0.07715	0.743	0.1331	0.61	0.1158		0.8275	0.0634	0.995	0.1334	1.21	0.09835	0.875	0.06095	0.9525	0.0608	1.0975	0.06115
0.377	0.0587	0.77	0.1018	0.367	0.06945			0.446	0.1029	0.468	0.0628	0.628	0.14825	0.65	0.1781			0.65	0.1499	0.673	0.09765	0.432	0.07185				0.885	0.06035							0.8875	0.049165	0.9425	0.048845
0.322	0.05095	0.6	0.109	0.428	0.1039							0.6	0.11765					0.439	0.08195	0.371	0.05155	0.411	0.05805				0.9325	0.07095									1.0325	0.0571
0.406	0.0653			0.263	0.0978							0.52	0.11065									0.529	0.0786				1.2575	0.0657									1.135	0.0594
0.359	0.0667			0.68	0.1413																																1.015	0.05435
0.301	0.04376																																				1.135	0.0629
0.28	0.05085																																				1.03	0.05795
0.335	0.05735																																				0.9825	0.0531
0.518	0.08645																																				0.9375	0.048185
0.731	0.11115																																				0.995	0.06475
0.438	0.0609																																				0.52	0.03026

## Sheet: Source Fig S10 (Table S14)
	Assignment	13C δ(ppm)MW time	0.1	0.2	0.4	0.8	1.6	3.2	6.4	12.8	25.6	51.2	102.4	204.8	409.6
Amino acids	Ile Cγ	15.61	95.7976	194.004	413.812	742.189	1284.01	1924.65	2497.55	2792.83	2836.96
	Leu Cδ	21.72	317.358	720.414	1478.33	2789.91	4808.57	7234.29	9104.1	9812.67	9919.77
	Ile Cγ/Pro Cγ/Ala Cβ/Arg Cγ	25.16	320.948	726.29	1528.49	2963.95	5204.06	8031.05	10257.3	11110.8	11278.3
	Gln Cβ	29.85	263.123	660.217	1302.8	2512.55	4376.32	6746.43	8647.78	9382.7	9432.52
	Glu Cγ/Hyp Cβ/Glu Cγ	34.71	201.359	461.031	954.595	1789.32	3165.44	4845	6216.57	6697.87	6742.9
	Leu Cβ	39.82	197.299	491.092	970.904	1882.46	3337.22	5158.14	6628.67	7166.29	7219.8
	Ala Cα	49.63	221.843	545.416	1122.78	2073.03	3597	5541.25	7101.69	7793.54	7850.83
	Asn Cα	52.87	327.899	732.496	1519.77	2883.43	5104.61	7831.53	10058	10923.8	11028.8
	Ala Co	173.5	390.786	878.037	1799.43	3414.37	6022.4	9286.13	11730.3	12578	12628.1
	Hyp Cα	58.67	503.439	1104.83	2255.19	4264.06	7381.29	11144	13994.3	15072.9	15166.9
	glycan C6/ Val Cα	62.51	431.487	958.417	1959.64	3686.82	6336.49	9481.83	11815.9	12587.9	12685.7
glycans	Man C4/6	65.75	464.27	1011.95	2027.62	3796.6	6465.45	9623.64	11929.2	12705.1	12818.4
	Man C2/Rha C5/Glc C2	69.8	630.651	1378.46	2735.2	5148.24	8736.06	13016.8	16123.6	17161.3	17297.3
	Gal C2	73	668.558	1492.88	2979.91	5648.52	9623.5	14248.5	17621.4	18704.5	18827.7
	Ara C2	82.3	206.916	391.322	789.096	1459.22	2523.79	3725.37	4611.36	4751.74	4755.66
	Gal C1	98.5	191.206	437.78	836.382	1581.68	2671.58	3954.1	4919.2	5151.54	5206.23
	Assignment	13C δ(ppm)MW time	0.1	0.2	0.4	0.8	1.6	3.2	6.4	12.8	25.6
Amino acids	Ile Cγ	15.61	3.37677	6.83844	14.5864	26.1614	45.2602	67.842	88.036	98.4444	100
	Leu Cδ	21.72	3.19925	7.26241	14.9028	28.1248	48.4747	72.928	91.7774	98.9204	100
	Ile Cγ/Pro Cγ/Ala Cβ/Arg Cγ	25.16	2.84571	6.43972	13.5525	26.2802	46.1423	71.2081	90.9474	98.5146	100
	Gln Cβ	29.85	2.78953	6.99937	13.8118	26.6371	46.3961	71.5231	91.6805	99.4718	100
	Glu Cγ/Hyp Cβ/Glu Cγ	34.71	2.98623	6.83728	14.157	26.5363	46.9448	71.8533	92.1943	99.3322	100
	Leu Cβ	39.82	2.73275	6.80202	13.4478	26.0736	46.2231	71.4444	91.8124	99.2588	100
	Ala Cα	49.63	2.82572	6.94724	14.3015	26.4052	45.8168	70.5817	90.4578	99.2702	100
	Asn Cα	52.87	2.97312	6.64167	13.78	26.1445	46.2843	71.0098	91.1978	99.0481	100
	Ala Co	173.5	3.09456	6.95301	14.2494	27.0378	47.6903	73.5352	92.8901	99.6032	100
	Hyp Cα	58.67	3.31933	7.28449	14.8692	28.1143	48.6672	73.4756	92.2685	99.3803	100
	glycan C6/ Val Cα	62.51	3.40138	7.55512	15.4477	29.0629	49.9501	74.7445	93.1435	99.2296	100
glycans	Man C4/6	65.75	3.6219	7.8945	15.818	29.6184	50.4387	75.0766	93.0628	99.1162	100
	Man C2/Rha C5/Glc C2	69.8	3.64594	7.96923	15.8129	29.7632	50.5052	75.2532	93.2142	99.2137	100
	Gal C2	73	3.55092	7.92916	15.8272	30.001	51.1134	75.6784	93.593	99.3457	100
	Ara C2	82.3	4.35095	8.22855	16.5928	30.6839	53.0692	78.3356	96.9657	99.9176	100
	Gal C1	98.5	3.67263	8.40877	16.065	30.3805	51.315	75.9494	94.4867	98.9495	100

## Sheet: Source Fig S12A (Table S16)
	CP (ms)	0.001	0.01	0.05	0.1	0.2	0.3	0.5	0.75	1	1.5	2	3	4	5	7.5	10			CP (ms)	0.001	0.01	0.05	0.1	0.2	0.3	0.5	0.75	1	1.5	2	3	4	5	7.5	10			amino acids
amino acids	15.4	9655.97	96475.1	416555	879502	1707820	1774770	1994390	1839990	1862170	1768490	1722630	1557280	1393670	1254800	1013730	812927		amino acids	15.4	0.00484156	0.0483732	0.208863	0.440988	0.856312	0.889881	1	0.922583	0.933704	0.886732	0.863738	0.78083	0.698795	0.629165	0.508291	0.407607		CP (ms)	15.4	16.3	19.2	20.7	20.7	24.9	29.7	35	37.9	50	61.4
	16.3	8339.22	40849.2	475655	912035	1807960	1787050	2044190	1825930	1932020	1798490	1736780	1545600	1416910	1250090	1060000	859560			16.3	0.00407947	0.0199831	0.232686	0.44616	0.884438	0.874209	1	0.893229	0.945127	0.879806	0.849618	0.756094	0.69314	0.611533	0.518543	0.420489		0.001	0.00484156	0.00407947	0.00869149	-0.00505552	0.00571607	0.00991475	0.0140793	0.0136828	0.015494	0.00836161	0.00541335
	19.2	36742.8	140770	849582	1.34947e+06	3573440	3945280	4227450	4025140	4140160	3930870	3770100	3414350	3077320	2788830	2162700	1759540			19.2	0.00869149	0.033299	0.200968	0.319216	0.845294	0.933253	1	0.952144	0.979352	0.929844	0.891814	0.807662	0.727938	0.659696	0.511585	0.416218		0.01	0.0483732	0.0199831	0.033299	0.0355404	0.0425949	0.0836465	0.11436	0.192218	0.163992	0.155079	0.0490587
	20.7	-16705.2	117438	718844	1.45512e+06	2776710	3046550	3278870	3233390	3304350	3226530	3150280	2967060	2758670	2590310	2017330	1642590			20.7	-0.00505552	0.0355404	0.217545	0.440365	0.84032	0.921982	0.992289	0.978525	1	0.976449	0.953374	0.897925	0.83486	0.783909	0.610507	0.497099		0.05	0.208863	0.232686	0.200968	0.217545	0.292561	0.423947	0.272352	0.335953	0.385742	0.287954	0.301664
	20.7	21049.7	156858	1077370	1.42594e+06	3063860	3441960	3682550	3647900	3599360	3490870	3323020	2993950	2706960	2364130	1870070	1116730			20.7	0.00571607	0.0425949	0.292561	0.387215	0.831994	0.934668	1	0.990591	0.97741	0.947949	0.902369	0.81301	0.735078	0.641982	0.507819	0.303249		0.1	0.440988	0.44616	0.319216	0.440365	0.387215	0.495467	0.471956	0.623038	0.614568	0.5906	0.318896
	24.9	36658.5	309272	1567490	1.83193e+06	3531230	3540550	3697370	3666320	3585480	3395350	3204360	2827120	2470260	2260210	1756670	1042340			24.9	0.00991475	0.0836465	0.423947	0.495467	0.955065	0.957586	1	0.991602	0.969738	0.918315	0.866659	0.76463	0.668113	0.611302	0.475113	0.281914		0.2	0.856312	0.884438	0.845294	0.84032	0.831994	0.955065	0.83642	0.877776	0.772384	0.780004	0.651446
	29.7	46321	376244	896040	1.55274e+06	2751830	3115910	3290010	3237990	3151570	2992460	2807150	2461850	2200130	1984600	1604710	1294740			29.7	0.0140793	0.11436	0.272352	0.471956	0.83642	0.947082	1	0.984188	0.957921	0.90956	0.853234	0.74828	0.66873	0.60322	0.487752	0.393537		0.3	0.889881	0.874209	0.933253	0.921982	0.934668	0.957586	0.947082	0.957537	0.932146	0.916601	0.748747
	35	34208.2	480560	839910	1.55764e+06	2194510	2393920	2500080	2368960	2238260	2097180	1942170	1748800	1586640	1413850	1155650	898046			35	0.0136828	0.192218	0.335953	0.623038	0.877776	0.957537	1	0.947554	0.895275	0.838845	0.776843	0.699498	0.634636	0.565522	0.462245	0.359207		0.5	1	1	1	0.992289	1	1	1	1	1	1	0.810357
	37.9	26346.2	278854	655920	1.04502e+06	1313370	1585030	1700410	1635040	1545270	1442440	1325960	1141620	1026020	918720	730038	604697			37.9	0.015494	0.163992	0.385742	0.614568	0.772384	0.932146	1	0.961556	0.908763	0.84829	0.779788	0.671379	0.603396	0.540293	0.42933	0.355618		0.75	0.922583	0.893229	0.952144	0.978525	0.990591	0.991602	0.984188	0.947554	0.961556	0.941857	0.892928
	50	23307.7	432277	802660	1.64627e+06	2174230	2554990	2787460	2625390	2453410	2375440	2236230	2009700	1810940	1622630	1309520	1122900			50	0.00836161	0.155079	0.287954	0.5906	0.780004	0.916601	1	0.941857	0.88016	0.852188	0.802246	0.720979	0.649674	0.582118	0.46979	0.40284		1	0.933704	0.945127	0.979352	1	0.97741	0.969738	0.957921	0.895275	0.908763	0.88016	0.943605
	61.4	39921.1	361786	2224640	2.35172e+06	4804130	5521680	5976030	6584950	6958670	7291350	7374560	6921090	6293480	5789980	4704760	3901390			61.4	0.00541335	0.0490587	0.301664	0.318896	0.651446	0.748747	0.810357	0.892928	0.943605	0.988717	1	0.938509	0.853404	0.785129	0.637972	0.529034		1.5	0.886732	0.879806	0.929844	0.976449	0.947949	0.918315	0.90956	0.838845	0.84829	0.852188	0.988717
	128.6	8762	55999.6	492000	653935	885630	1030870	1084920	1037780	956057	913373	830227	686071	624780	581418	470664	333446			128.6	0.00807617	0.0516163	0.453489	0.60275	0.816309	0.950181	1	0.95655	0.881223	0.84188	0.765242	0.63237	0.575876	0.535908	0.433824	0.307346		2	0.863738	0.849618	0.891814	0.953374	0.902369	0.866659	0.853234	0.776843	0.779788	0.802246	1
	172.2	8968.62	30136	342271	1.12305e+06	1691690	2209490	2616920	3109250	3264460	3288850	3373220	3262250	3025070	2654140	2171440	1643450			172.2	0.00265877	0.0089339	0.101467	0.332932	0.501506	0.655009	0.775793	0.921745	0.967758	0.974988	1	0.967103	0.89679	0.786827	0.643729	0.487205		3	0.78083	0.756094	0.807662	0.897925	0.81301	0.76463	0.74828	0.699498	0.671379	0.720979	0.938509
Glycans	63.2	40724.8	310616	1866160	2571499	4075610	4678640	4992530	4843880	4911130	4959950	4822770	4728220	4428450	4154390	3650730	3281920		Glycans	63.2	0.00815714	0.0622161	0.37379	0.515069	0.816342	0.937128	1	0.970226	0.983696	0.993474	0.965997	0.947059	0.887015	0.832121	0.731238	0.657366		4	0.698795	0.69314	0.727938	0.83486	0.735078	0.668113	0.66873	0.634636	0.603396	0.649674	0.853404
	69.7	52245.5	574898	3004030	4.14375e+06	5468250	5858850	6273480	6414750	6440810	6407460	6248640	5819580	5303590	4884900	4071670	3483290			69.7	0.00811163	0.0892586	0.466406	0.643359	0.849	0.909645	0.97402	0.995954	1	0.994822	0.970164	0.903548	0.823435	0.758429	0.632167	0.540816		5	0.629165	0.611533	0.659696	0.783909	0.641982	0.611302	0.60322	0.565522	0.540293	0.582118	0.785129
	73.2	72426.4	749658	4021840	5516497	7236630	7769100	8098920	8418920	8516450	8647430	8499310	8004390	7361310	6857060	5730610	4990220			73.2	0.00837548	0.0866915	0.465091	0.637935	0.836853	0.898429	0.93657	0.973575	0.984853	1	0.982871	0.925638	0.851271	0.792959	0.662695	0.577076		7.5	0.508291	0.518543	0.511585	0.610507	0.507819	0.475113	0.487752	0.462245	0.42933	0.46979	0.637972
	76.4	45462.2	457740	2408440	3253376	4253690	5110190	5634470	6054880	6349470	6752610	6824620	6610630	5999380	5600500	4594500	3869300			76.4	0.0066615	0.0670718	0.352905	0.476712	0.623286	0.748787	0.825609	0.887211	0.930377	0.989448	1	0.968644	0.879079	0.820632	0.673224	0.566962		10	0.407607	0.420489	0.416218	0.497099	0.303249	0.281914	0.393537	0.359207	0.355618	0.40284	0.529034
	82.1	73252.5	447788	2677910	3669841	4153580	4615670	4709960	4561460	4499220	4371320	4287940	3926540	3638870	3365750	2838470	2386670			82.1	0.0155527	0.0950725	0.568563	0.779166	0.881872	0.979981	1	0.968471	0.955257	0.928101	0.910398	0.833667	0.77259	0.714603	0.602653	0.506728
	83.9	22841.8	298554	1555790	2.02037e+06	2505280	2728760	2752980	2607670	2564600	2482400	2400090	2252020	2010400	1836940	1485420	1238600			83.9	0.00829711	0.108448	0.565129	0.733887	0.910025	0.991202	1	0.947217	0.931572	0.901714	0.871815	0.81803	0.730263	0.667255	0.539568	0.449912
	94.8	-5538.22	156330	591522	776888	893525	1043440	1104070	1105160	1114560	1084910	1044370	949924	874520	801832	624408	513131			94.8	-0.00496897	0.140261	0.530723	0.697036	0.801684	0.93619	0.990588	0.991566	1	0.973398	0.937024	0.852286	0.784633	0.719416	0.560228	0.460389			amino acids
	97.1	-12109.7	113350	787320	1096774	1268480	1645020	1889930	2096660	2285150	2385320	2332000	2043750	1889740	1696000	1263230	1023630			97.1	-0.00507677	0.0475197	0.330069	0.459802	0.531786	0.689643	0.792317	0.878985	0.958006	1	0.977647	0.856803	0.792238	0.711016	0.529585	0.429137		CP (ms)	15.4	16.3	19.2	20.7	20.7	24.9	29.7	35	37.9	50	61.4
	98.2	12632.6	324322	1629690	2229248	2327980	2790720	2796360	2717040	2691810	2643730	2533720	2331770	2105440	1921320	1589950	1357010			98.2	0.0045175	0.11598	0.58279	0.797196	0.832504	0.997983	1	0.971635	0.962612	0.945418	0.906078	0.833859	0.752922	0.687079	0.568578	0.485277		0.001	0.00484156	0.00407947	0.00869149	-0.00505552	0.00571607	0.00991475	0.0140793	0.0136828	0.015494	0.00836161	0.00541335
	100.2	35550.1	174573	950219	1274469	1503340	1764770	1871180	1937380	1985550	2025460	1988560	1819850	1706790	1601080	1309650	1129470			100.2	0.0175516	0.0861894	0.469138	0.629224	0.742222	0.871293	0.92383	0.956514	0.980296	1	0.981782	0.898487	0.842668	0.790477	0.646594	0.557636		0.01	0.0483732	0.0199831	0.033299	0.0355404	0.0425949	0.0836465	0.11436	0.192218	0.163992	0.155079	0.0490587
	103.6	-7915.09	59886.5	443839	565635	952031	1220500	1356950	1527250	1510760	1543100	1446250	1260480	1086310	953601	714145	495230			103.6	-0.00512935	0.0388092	0.287628	0.366558	0.61696	0.79094	0.879366	0.989728	0.979042	1	0.937237	0.816849	0.703979	0.617978	0.462799	0.320932		0.05	0.208863	0.232686	0.200968	0.217545	0.292561	0.423947	0.272352	0.335953	0.385742	0.287954	0.301664
	107.4	-23539.5	131672	674814	1.01881e+06	1310870	1366590	1477310	1476730	1442720	1420660	1430150	1355690	1189580	1097520	944410	838679			107.4	-0.015934	0.0891294	0.456785	0.689637	0.887336	0.925053	1	0.999607	0.976586	0.961653	0.968077	0.917675	0.805234	0.742918	0.639277	0.567707		0.1	0.440988	0.44616	0.319216	0.440365	0.387215	0.495467	0.471956	0.623038	0.614568	0.5906	0.318896
	108.5	-14724.1	86866.2	512124	746788	926390	1084990	1129130	1064570	1064940	1053700	990783	892529	820600	729432	585659	483169			108.5	-0.0130402	0.0769319	0.453556	0.661384	0.820446	0.960908	1	0.942823	0.943151	0.933196	0.877475	0.790457	0.726754	0.646013	0.518681	0.427913		0.2	0.856312	0.884438	0.845294	0.84032	0.831994	0.955065	0.83642	0.877776	0.772384	0.780004	0.651446
																																						0.3	0.889881	0.874209	0.933253	0.921982	0.934668	0.957586	0.947082	0.957537	0.932146	0.916601	0.748747
																																						0.5	1	1	1	0.992289	1	1	1	1	1	1	0.810357
																																						0.75	0.922583	0.893229	0.952144	0.978525	0.990591	0.991602	0.984188	0.947554	0.961556	0.941857	0.892928
																																						1	0.933704	0.945127	0.979352	1	0.97741	0.969738	0.957921	0.895275	0.908763	0.88016	0.943605
																																						1.5	0.886732	0.879806	0.929844	0.976449	0.947949	0.918315	0.90956	0.838845	0.84829	0.852188	0.988717
																																						2	0.863738	0.849618	0.891814	0.953374	0.902369	0.866659	0.853234	0.776843	0.779788	0.802246	1
																																						3	0.78083	0.756094	0.807662	0.897925	0.81301	0.76463	0.74828	0.699498	0.671379	0.720979	0.938509
																																						4	0.698795	0.69314	0.727938	0.83486	0.735078	0.668113	0.66873	0.634636	0.603396	0.649674	0.853404
																																						5	0.629165	0.611533	0.659696	0.783909	0.641982	0.611302	0.60322	0.565522	0.540293	0.582118	0.785129
																																						7.5	0.508291	0.518543	0.511585	0.610507	0.507819	0.475113	0.487752	0.462245	0.42933	0.46979	0.637972
																																						10	0.407607	0.420489	0.416218	0.497099	0.303249	0.281914	0.393537	0.359207	0.355618	0.40284	0.529034
																																							CP (ms)	0.001	0.01	0.05	0.1	0.2	0.3	0.5	0.75	1	1.5
																																						amino acids	15.4	0.00484156	0.0483732	0.208863	0.440988	0.856312	0.889881	1	0.922583	0.933704	0.886732
																																							16.3	0.00407947	0.0199831	0.232686	0.44616	0.884438	0.874209	1	0.893229	0.945127	0.879806
																																							19.2	0.00869149	0.033299	0.200968	0.319216	0.845294	0.933253	1	0.952144	0.979352	0.929844
																																							20.7	-0.00505552	0.0355404	0.217545	0.440365	0.84032	0.921982	0.992289	0.978525	1	0.976449
																																							20.7	0.00571607	0.0425949	0.292561	0.387215	0.831994	0.934668	1	0.990591	0.97741	0.947949
																																							24.9	0.00991475	0.0836465	0.423947	0.495467	0.955065	0.957586	1	0.991602	0.969738	0.918315
																																							29.7	0.0140793	0.11436	0.272352	0.471956	0.83642	0.947082	1	0.984188	0.957921	0.90956
																																							35	0.0136828	0.192218	0.335953	0.623038	0.877776	0.957537	1	0.947554	0.895275	0.838845
																																							37.9	0.015494	0.163992	0.385742	0.614568	0.772384	0.932146	1	0.961556	0.908763	0.84829
																																							50	0.00836161	0.155079	0.287954	0.5906	0.780004	0.916601	1	0.941857	0.88016	0.852188
																																							61.4	0.00541335	0.0490587	0.301664	0.318896	0.651446	0.748747	0.810357	0.892928	0.943605	0.988717
																																							128.6	0.00807617	0.0516163	0.453489	0.60275	0.816309	0.950181	1	0.95655	0.881223	0.84188
																																							172.2	0.00265877	0.0089339	0.101467	0.332932	0.501506	0.655009	0.775793	0.921745	0.967758	0.974988
																																						Glycans	63.2	0.00815714	0.0622161	0.37379	0.515069	0.816342	0.937128	1	0.970226	0.983696	0.993474
																																							69.7	0.00811163	0.0892586	0.466406	0.643359	0.849	0.909645	0.97402	0.995954	1	0.994822
																																							73.2	0.00837548	0.0866915	0.465091	0.637935	0.836853	0.898429	0.93657	0.973575	0.984853	1
																																							76.4	0.0066615	0.0670718	0.352905	0.476712	0.623286	0.748787	0.825609	0.887211	0.930377	0.989448
																																							82.1	0.0155527	0.0950725	0.568563	0.779166	0.881872	0.979981	1	0.968471	0.955257	0.928101
																																							83.9	0.00829711	0.108448	0.565129	0.733887	0.910025	0.991202	1	0.947217	0.931572	0.901714
																																							94.8	-0.00496897	0.140261	0.530723	0.697036	0.801684	0.93619	0.990588	0.991566	1	0.973398
																																							97.1	-0.00507677	0.0475197	0.330069	0.459802	0.531786	0.689643	0.792317	0.878985	0.958006	1
																																							98.2	0.0045175	0.11598	0.58279	0.797196	0.832504	0.997983	1	0.971635	0.962612	0.945418
																																							100.2	0.0175516	0.0861894	0.469138	0.629224	0.742222	0.871293	0.92383	0.956514	0.980296	1
																																							103.6	-0.00512935	0.0388092	0.287628	0.366558	0.61696	0.79094	0.879366	0.989728	0.979042	1
																																							107.4	-0.015934	0.0891294	0.456785	0.689637	0.887336	0.925053	1	0.999607	0.976586	0.961653
																																							108.5	-0.0130402	0.0769319	0.453556	0.661384	0.820446	0.960908	1	0.942823	0.943151	0.933196
[truncated: 25 more columns]

## Sheet: Source Fig S12B (Table S17)
	CP (ms)	0.001	0.01	0.05	0.1	0.2	0.3	0.5	0.75	1	1.5	2	3	4	5	7.5	10			CP (ms)	0.001	0.01	0.05	0.1	0.2	0.3	0.5	0.75	1	1.5	2	3	4	5	7.5	10			amino acids
amino acids	15.4	9655.97	96475.1	416555	879502	1707820	1774770	1994390	1839990	1862170	1768490	1722630	1557280	1393670	1254800	1013730	812927		amino acids	15.4	0.00484156	0.0483732	0.208863	0.440988	0.856312	0.889881	1	0.922583	0.933704	0.886732	0.863738	0.78083	0.698795	0.629165	0.508291	0.407607		CP (ms)	15.4	16.3	19.2	20.7	20.7	24.9	29.7	35	37.9	50	61.4
	16.3	8339.22	40849.2	475655	912035	1807960	1787050	2044190	1825930	1932020	1798490	1736780	1545600	1416910	1250090	1060000	859560			16.3	0.00407947	0.0199831	0.232686	0.44616	0.884438	0.874209	1	0.893229	0.945127	0.879806	0.849618	0.756094	0.69314	0.611533	0.518543	0.420489		0.001	0.00484156	0.00407947	0.00869149	-0.00505552	0.00571607	0.00991475	0.0140793	0.0136828	0.015494	0.00836161	0.00541335
	19.2	36742.8	140770	849582	1.34947e+06	3573440	3945280	4227450	4025140	4140160	3930870	3770100	3414350	3077320	2788830	2162700	1759540			19.2	0.00869149	0.033299	0.200968	0.319216	0.845294	0.933253	1	0.952144	0.979352	0.929844	0.891814	0.807662	0.727938	0.659696	0.511585	0.416218		0.01	0.0483732	0.0199831	0.033299	0.0355404	0.0425949	0.0836465	0.11436	0.192218	0.163992	0.155079	0.0490587
	20.7	-16705.2	117438	718844	1.45512e+06	2776710	3046550	3278870	3233390	3304350	3226530	3150280	2967060	2758670	2590310	2017330	1642590			20.7	-0.00505552	0.0355404	0.217545	0.440365	0.84032	0.921982	0.992289	0.978525	1	0.976449	0.953374	0.897925	0.83486	0.783909	0.610507	0.497099		0.05	0.208863	0.232686	0.200968	0.217545	0.292561	0.423947	0.272352	0.335953	0.385742	0.287954	0.301664
	20.7	21049.7	156858	1077370	1.42594e+06	3063860	3441960	3682550	3647900	3599360	3490870	3323020	2993950	2706960	2364130	1870070	1116730			20.7	0.00571607	0.0425949	0.292561	0.387215	0.831994	0.934668	1	0.990591	0.97741	0.947949	0.902369	0.81301	0.735078	0.641982	0.507819	0.303249		0.1	0.440988	0.44616	0.319216	0.440365	0.387215	0.495467	0.471956	0.623038	0.614568	0.5906	0.318896
	24.9	36658.5	309272	1567490	1.83193e+06	3531230	3540550	3697370	3666320	3585480	3395350	3204360	2827120	2470260	2260210	1756670	1042340			24.9	0.00991475	0.0836465	0.423947	0.495467	0.955065	0.957586	1	0.991602	0.969738	0.918315	0.866659	0.76463	0.668113	0.611302	0.475113	0.281914		0.2	0.856312	0.884438	0.845294	0.84032	0.831994	0.955065	0.83642	0.877776	0.772384	0.780004	0.651446
	29.7	46321	376244	896040	1.55274e+06	2751830	3115910	3290010	3237990	3151570	2992460	2807150	2461850	2200130	1984600	1604710	1294740			29.7	0.0140793	0.11436	0.272352	0.471956	0.83642	0.947082	1	0.984188	0.957921	0.90956	0.853234	0.74828	0.66873	0.60322	0.487752	0.393537		0.3	0.889881	0.874209	0.933253	0.921982	0.934668	0.957586	0.947082	0.957537	0.932146	0.916601	0.748747
	35	34208.2	480560	839910	1.55764e+06	2194510	2393920	2500080	2368960	2238260	2097180	1942170	1748800	1586640	1413850	1155650	898046			35	0.0136828	0.192218	0.335953	0.623038	0.877776	0.957537	1	0.947554	0.895275	0.838845	0.776843	0.699498	0.634636	0.565522	0.462245	0.359207		0.5	1	1	1	0.992289	1	1	1	1	1	1	0.810357
	37.9	26346.2	278854	655920	1.04502e+06	1313370	1585030	1700410	1635040	1545270	1442440	1325960	1141620	1026020	918720	730038	604697			37.9	0.015494	0.163992	0.385742	0.614568	0.772384	0.932146	1	0.961556	0.908763	0.84829	0.779788	0.671379	0.603396	0.540293	0.42933	0.355618		0.75	0.922583	0.893229	0.952144	0.978525	0.990591	0.991602	0.984188	0.947554	0.961556	0.941857	0.892928
	50	23307.7	432277	802660	1.64627e+06	2174230	2554990	2787460	2625390	2453410	2375440	2236230	2009700	1810940	1622630	1309520	1122900			50	0.00836161	0.155079	0.287954	0.5906	0.780004	0.916601	1	0.941857	0.88016	0.852188	0.802246	0.720979	0.649674	0.582118	0.46979	0.40284		1	0.933704	0.945127	0.979352	1	0.97741	0.969738	0.957921	0.895275	0.908763	0.88016	0.943605
	61.4	39921.1	361786	2224640	2.35172e+06	4804130	5521680	5976030	6584950	6958670	7291350	7374560	6921090	6293480	5789980	4704760	3901390			61.4	0.00541335	0.0490587	0.301664	0.318896	0.651446	0.748747	0.810357	0.892928	0.943605	0.988717	1	0.938509	0.853404	0.785129	0.637972	0.529034		1.5	0.886732	0.879806	0.929844	0.976449	0.947949	0.918315	0.90956	0.838845	0.84829	0.852188	0.988717
	128.6	8762	55999.6	492000	653935	885630	1030870	1084920	1037780	956057	913373	830227	686071	624780	581418	470664	333446			128.6	0.00807617	0.0516163	0.453489	0.60275	0.816309	0.950181	1	0.95655	0.881223	0.84188	0.765242	0.63237	0.575876	0.535908	0.433824	0.307346		2	0.863738	0.849618	0.891814	0.953374	0.902369	0.866659	0.853234	0.776843	0.779788	0.802246	1
	172.2	8968.62	30136	342271	1.12305e+06	1691690	2209490	2616920	3109250	3264460	3288850	3373220	3262250	3025070	2654140	2171440	1643450			172.2	0.00265877	0.0089339	0.101467	0.332932	0.501506	0.655009	0.775793	0.921745	0.967758	0.974988	1	0.967103	0.89679	0.786827	0.643729	0.487205		3	0.78083	0.756094	0.807662	0.897925	0.81301	0.76463	0.74828	0.699498	0.671379	0.720979	0.938509
Glycans	63.2	40724.8	310616	1866160	2571499	4075610	4678640	4992530	4843880	4911130	4959950	4822770	4728220	4428450	4154390	3650730	3281920		Glycans	63.2	0.00815714	0.0622161	0.37379	0.515069	0.816342	0.937128	1	0.970226	0.983696	0.993474	0.965997	0.947059	0.887015	0.832121	0.731238	0.657366		4	0.698795	0.69314	0.727938	0.83486	0.735078	0.668113	0.66873	0.634636	0.603396	0.649674	0.853404
	69.7	52245.5	574898	3004030	4.14375e+06	5468250	5858850	6273480	6414750	6440810	6407460	6248640	5819580	5303590	4884900	4071670	3483290			69.7	0.00811163	0.0892586	0.466406	0.643359	0.849	0.909645	0.97402	0.995954	1	0.994822	0.970164	0.903548	0.823435	0.758429	0.632167	0.540816		5	0.629165	0.611533	0.659696	0.783909	0.641982	0.611302	0.60322	0.565522	0.540293	0.582118	0.785129
	73.2	72426.4	749658	4021840	5516497	7236630	7769100	8098920	8418920	8516450	8647430	8499310	8004390	7361310	6857060	5730610	4990220			73.2	0.00837548	0.0866915	0.465091	0.637935	0.836853	0.898429	0.93657	0.973575	0.984853	1	0.982871	0.925638	0.851271	0.792959	0.662695	0.577076		7.5	0.508291	0.518543	0.511585	0.610507	0.507819	0.475113	0.487752	0.462245	0.42933	0.46979	0.637972
	76.4	45462.2	457740	2408440	3253376	4253690	5110190	5634470	6054880	6349470	6752610	6824620	6610630	5999380	5600500	4594500	3869300			76.4	0.0066615	0.0670718	0.352905	0.476712	0.623286	0.748787	0.825609	0.887211	0.930377	0.989448	1	0.968644	0.879079	0.820632	0.673224	0.566962		10	0.407607	0.420489	0.416218	0.497099	0.303249	0.281914	0.393537	0.359207	0.355618	0.40284	0.529034
	82.1	73252.5	447788	2677910	3669841	4153580	4615670	4709960	4561460	4499220	4371320	4287940	3926540	3638870	3365750	2838470	2386670			82.1	0.0155527	0.0950725	0.568563	0.779166	0.881872	0.979981	1	0.968471	0.955257	0.928101	0.910398	0.833667	0.77259	0.714603	0.602653	0.506728
	83.9	22841.8	298554	1555790	2.02037e+06	2505280	2728760	2752980	2607670	2564600	2482400	2400090	2252020	2010400	1836940	1485420	1238600			83.9	0.00829711	0.108448	0.565129	0.733887	0.910025	0.991202	1	0.947217	0.931572	0.901714	0.871815	0.81803	0.730263	0.667255	0.539568	0.449912
	94.8	-5538.22	156330	591522	776888	893525	1043440	1104070	1105160	1114560	1084910	1044370	949924	874520	801832	624408	513131			94.8	-0.00496897	0.140261	0.530723	0.697036	0.801684	0.93619	0.990588	0.991566	1	0.973398	0.937024	0.852286	0.784633	0.719416	0.560228	0.460389
	97.1	-12109.7	113350	787320	1096774	1268480	1645020	1889930	2096660	2285150	2385320	2332000	2043750	1889740	1696000	1263230	1023630			97.1	-0.00507677	0.0475197	0.330069	0.459802	0.531786	0.689643	0.792317	0.878985	0.958006	1	0.977647	0.856803	0.792238	0.711016	0.529585	0.429137
	98.2	12632.6	324322	1629690	2229248	2327980	2790720	2796360	2717040	2691810	2643730	2533720	2331770	2105440	1921320	1589950	1357010			98.2	0.0045175	0.11598	0.58279	0.797196	0.832504	0.997983	1	0.971635	0.962612	0.945418	0.906078	0.833859	0.752922	0.687079	0.568578	0.485277
	100.2	35550.1	174573	950219	1274469	1503340	1764770	1871180	1937380	1985550	2025460	1988560	1819850	1706790	1601080	1309650	1129470			100.2	0.0175516	0.0861894	0.469138	0.629224	0.742222	0.871293	0.92383	0.956514	0.980296	1	0.981782	0.898487	0.842668	0.790477	0.646594	0.557636
	103.6	-7915.09	59886.5	443839	565635	952031	1220500	1356950	1527250	1510760	1543100	1446250	1260480	1086310	953601	714145	495230			103.6	-0.00512935	0.0388092	0.287628	0.366558	0.61696	0.79094	0.879366	0.989728	0.979042	1	0.937237	0.816849	0.703979	0.617978	0.462799	0.320932
	107.4	-23539.5	131672	674814	1.01881e+06	1310870	1366590	1477310	1476730	1442720	1420660	1430150	1355690	1189580	1097520	944410	838679			107.4	-0.015934	0.0891294	0.456785	0.689637	0.887336	0.925053	1	0.999607	0.976586	0.961653	0.968077	0.917675	0.805234	0.742918	0.639277	0.567707
	108.5	-14724.1	86866.2	512124	746788	926390	1084990	1129130	1064570	1064940	1053700	990783	892529	820600	729432	585659	483169			108.5	-0.0130402	0.0769319	0.453556	0.661384	0.820446	0.960908	1	0.942823	0.943151	0.933196	0.877475	0.790457	0.726754	0.646013	0.518681	0.427913
[truncated: 25 more columns]

## Sheet: Source Fig S13A 1H T1
overlap	error/2	Co	error/2	Tyr	error/2	Pro	error/2	Phe	error/2	Leu	error/2	Ile	error/2	Gly	error/2	Glu	error/2	Asn	error/2	Ala	error/2	Ser	error/2	Thr	error/2		Man	error/2	Ara	error/2	Gal	error/2	Xyl	error/2	overlap	error/2
0.637	0.030065	0.666	0.022	0.61	0.081	0.624	0.02068	0.654	0.05985	0.672	0.0136	0.679	0.01894	0.671	0.040295	0.641	0.01788	0.617	0.02091	0.661	0.01539	0.676	0.015905	0.643	0.00924		0.629	0.06135	0.667	0.012935	0.643	0.037315	0.676	0.019485	0.67	0.034205
0.662	0.011235	0.67	0.018555	0.534	0.0933							0.76	0.11655	0.654	0.021885			0.66	0.048305			0.659	0.01459				0.624	0.04877	0.443	0.161					0.663	0.009595
0.653	0.012985	0.66	0.01253									0.661	0.0533														0.665	0.01597	0.642	0.03647					0.666	0.012495
0.691	0.014785																																		0.676	0.008805
0.648	0.01247																																		0.656	0.01108
0.653	0.01225																																		0.681	0.007625
0.654	0.010025																																		0.67	0.01313
0.667	0.00773																																		0.672	0.01272
0.684	0.02048																																		0.674	0.01654
0.649	0.0537																																		0.646	0.012675
0.632	0.02645																																		0.67	0.011265
0.653	0.0116																																		0.664	0.010175
0.637	0.016575																																		0.654	0.00783
0.65	0.01593
0.646	0.019105
0.639	0.01438
0.625	0.01467
0.648	0.00948
0.654	0.0126
0.662	0.022805

## Sheet: Source Fig S13B 1H T1rho
overlap	error/2	Co	error/2	Tyr	error/2	Lys	error/2	Leu	error/2	Ile	error/2	Gly	error/2		Man	error/2	overlap	error/2
14.13	0.12415	8.025	0.003542	9.3	0.0788	4.515	0.007475	7.68	0.018915	5.46	0.21575	7.86	0.005555		19.14	0.724	22.8	0.01029
8.265	0.18715	10.95	0.003481												13.56	0.0567	20.28	0.002756
13.005	0.075																25.77	0.0038005
12.735	0.07135																30.3	0.02483
8.7	0.01726																15.3	0.0778
4.755	0.006
3.585	0.004568
2.565	0.000811
5.97	0.03005

[truncated: 1 more sheets: Source Fig S13C 13C T1rho]
